1 **Serotonergic modulation of walking in *Drosophila***

2

3 Clare E. Howard <sup>1,2</sup>, Chin-Lin Chen <sup>3,4</sup>, Tanya Tabachnik <sup>5</sup>, Rick Hormigo <sup>5</sup>, Pavan Ramdya <sup>3,4</sup>,  
4 Richard S. Mann <sup>1</sup>

5

6 1 Mortimer B. Zuckerman Mind Brain Behavior Institute, Columbia University, New York, NY,  
7 USA

8 2 Medical Scientist Training Program, Columbia University, New York, NY, USA

9 3 Brain Mind Institute, École Polytechnique Fédérale de Lausanne, CH-1015 Lausanne,  
10 Switzerland

11 4 Interfaculty Institute of Bioengineering, École Polytechnique Fédérale de Lausanne, CH-1015  
12 Lausanne, Switzerland.

13 5 Advanced Instrumentation Group, Zuckerman Mind Brain Behavior Institute, Columbia  
14 University, New York, NY, USA

15

16 **Abstract**

17 To navigate complex environments, animals must generate highly robust, yet flexible, locomotor  
18 behaviors. For example, walking speed must be tailored to the needs of a particular  
19 environment: Not only must animals choose the correct speed and gait, they must also rapidly  
20 adapt to changing conditions, and respond to sudden and surprising new stimuli.  
21 Neuromodulators, particularly the small biogenic amine neurotransmitters, allow motor circuits  
22 to rapidly alter their output by changing their functional connectivity. Here we show that the  
23 serotonergic system in the vinegar fly, *Drosophila melanogaster*, can modulate walking speed in  
24 a variety of contexts and in response to sudden changes in the environment. These multifaceted  
25 roles of serotonin in locomotion are differentially mediated by a family of serotonergic receptors  
26 with distinct activities and expression patterns.

27

## 28 Introduction

29 Insects have a remarkable capacity to adapt their locomotor behaviors across a wide  
30 range of environmental contexts and to confront numerous challenges. For example, they can  
31 walk forwards, backwards, and upside down, navigate complex terrains, and rapidly recover  
32 after injury [1-9]. To achieve this wide range of behaviors, insects regulate their global walking  
33 speed and kinematic parameters, allowing them to modify stereotyped gaits as needed [3,5-  
34 7,9,10]. Because overlapping sets of motor neurons and muscles are recruited for all of these  
35 behaviors, animals must be able to rapidly modulate the circuit dynamics that control locomotor  
36 parameters [11-13] (reviewed in [14]).

37 As with limbed vertebrates, most insects use multi-jointed legs to walk [8,10,15-17]. Locomotor  
38 circuits that orchestrate these complex gaits are located in the ventral nerve cord (VNC), a  
39 functional analogue of the vertebrate spinal cord that includes three pairs of thoracic  
40 neuromeres (T1, T2, and T3) that coordinate the movements of the three pairs of thoracic legs  
41 [1-9,18-20]. The insect VNC receives descending commands from the brain and sends motor  
42 output instructions via motor neurons to peripheral musculature [3,5-7,9,10,19]. Leg motor  
43 neuron dendrites innervate the leg neuropils within the VNC and their axons exit the VNC to  
44 synapse onto muscles in the appendages [11-13,21,22]. Sensory neurons, which convey  
45 proprioceptive and tactile information, project axons from the appendages to the VNC by these  
46 same fiber tracts, where they arborize in the leg neuropils [14,23,24] (Figure 1A). Notably, the  
47 VNC is capable of executing coordinated leg motor behaviors, such as walking and grooming,  
48 even in decapitated animals [8,10,15-17,25]. Thus, the VNC harbors neural networks that can  
49 drive the coordinated flexion and extension of each leg joint and, therefore, walking gaits  
50 [8,10,17,20,26].

51 Numerous studies have shown that sensory input from the legs are required for robust  
52 and stereotyped locomotor patterns, regulating both the timing and magnitude of locomotor  
53 activity and also facilitating coordination between legs [6,8,10,12,27-29]. However, sensory  
54 feedback cannot be the only means for tuning locomotion: mutation of proprioceptive receptors  
55 or even deafferenting limbs does not block coordinated walking [10,15,18,30-33]. Beyond  
56 sensory feedback-driven tuning of gait patterns, larger behavioral changes must be  
57 accomplished by other circuits. These likely include neuromodulatory systems, including the  
58 monoamines dopamine, norepinephrine, and serotonin, which are highly conserved throughout  
59 the animal kingdom.

60 Monoamines have been shown to modulate, and even induce, the activities of central pattern  
61 generating (CPG) motor circuits. In crustaceans, for example, neuromodulation causes the  
62 gastric CPG to generate distinct rhythmic activity patterns from the same neural network to  
63 address distinct behavioral demands [34-39] (reviewed in [13,40]). Remarkably, the same  
64 neuromodulatory systems appear to play similar roles across species. For example, serotonin  
65 has been shown to slow locomotor rhythms in animals as diverse as the lamprey, cat, and  
66 locust [41-43]. In the vinegar fly, *Drosophila melanogaster*, monoamine neurotransmitters have  
67 also been shown to modulate walking behavior. In addition to slowing walking speed, serotonin  
68 modulates sleep and anxiety-related motor behaviors [3,5,6,9,10,44-48]. Dopamine, in contrast,  
69 has been linked to hyperactivity [25,49-52]. Octopamine has been shown to mediate starvation  
70 induced hyperactivity, and in its absence animals walk more slowly [8,53,54]. As each of these  
71 neuromodulatory systems plays a variety of roles in regulating complex behaviors, it has thus  
72 far been challenging to tease apart which of the effects on walking behavior are due to direct  
73 modulation of motor circuitry or are a secondary consequence of modulating higher order  
74 circuits in the brain.

75 In this work, we show that the serotonergic neurons within the VNC can modulate  
76 walking speed in a context-independent manner as well as in response to startling stimuli.  
77 Additionally, we demonstrate that these modulatory effects are enacted through serotonin's  
78 action via specific receptors that are expressed in different parts of the locomotor circuit.  
79 Together, these findings reveal that neuromodulatory systems regulate multiple aspects of  
80 complex behaviors such as walking at multiple time scales, allowing animals to effectively  
81 respond to rapidly changing environments.

82

## 83 **Results**

### 84 **VNC serotonergic neurons arborize within the leg neuropils**

85 To identify neuromodulatory neurons that might play a role in modulating walking  
86 behavior we drove expression of a fluorescent reporter with Gal4 under the control of promoters  
87 encoding key synthetic enzymes for each neuromodulatory system – *Tryptophan hydroxylase*  
88 (*Trh* for serotonin (5-HT) [55]); *tyrosine hydroxylase* (*TH* or *ple* (*pale*) for dopamine [56]); and  
89 *Tyrosine decarboxylase 2* (*Tdc2* for octopamine and tyramine [57]). All of these drivers show  
90 extensive expression in cells both within the VNC and the brain, with processes that densely  
91 innervate VNC leg neuromeres (Figure 1) [55].

92           To determine whether local VNC neurons or descending neurons originating in the brain  
93 innervate the leg neuropils, we used genetic intersectional tools to limit the expression of these  
94 Gal4 lines to either the brain or VNC (Figure 1A). These experiments show that  
95 neuromodulatory innervation of the leg neuropils arises almost entirely from VNC interneurons  
96 and not from descending neurons in the brain (Figure 1B-G). Moreover, in many cases, these  
97 VNC neurons extensively innervate the leg neuropils. Thus, VNC neuromodulatory neurons are  
98 well-positioned to directly modulate VNC locomotor circuits. These intersectional genetic tools  
99 therefore allow us to assess the behavioral role of local VNC neuromodulation independently of  
100 modulation within higher brain regions.

101

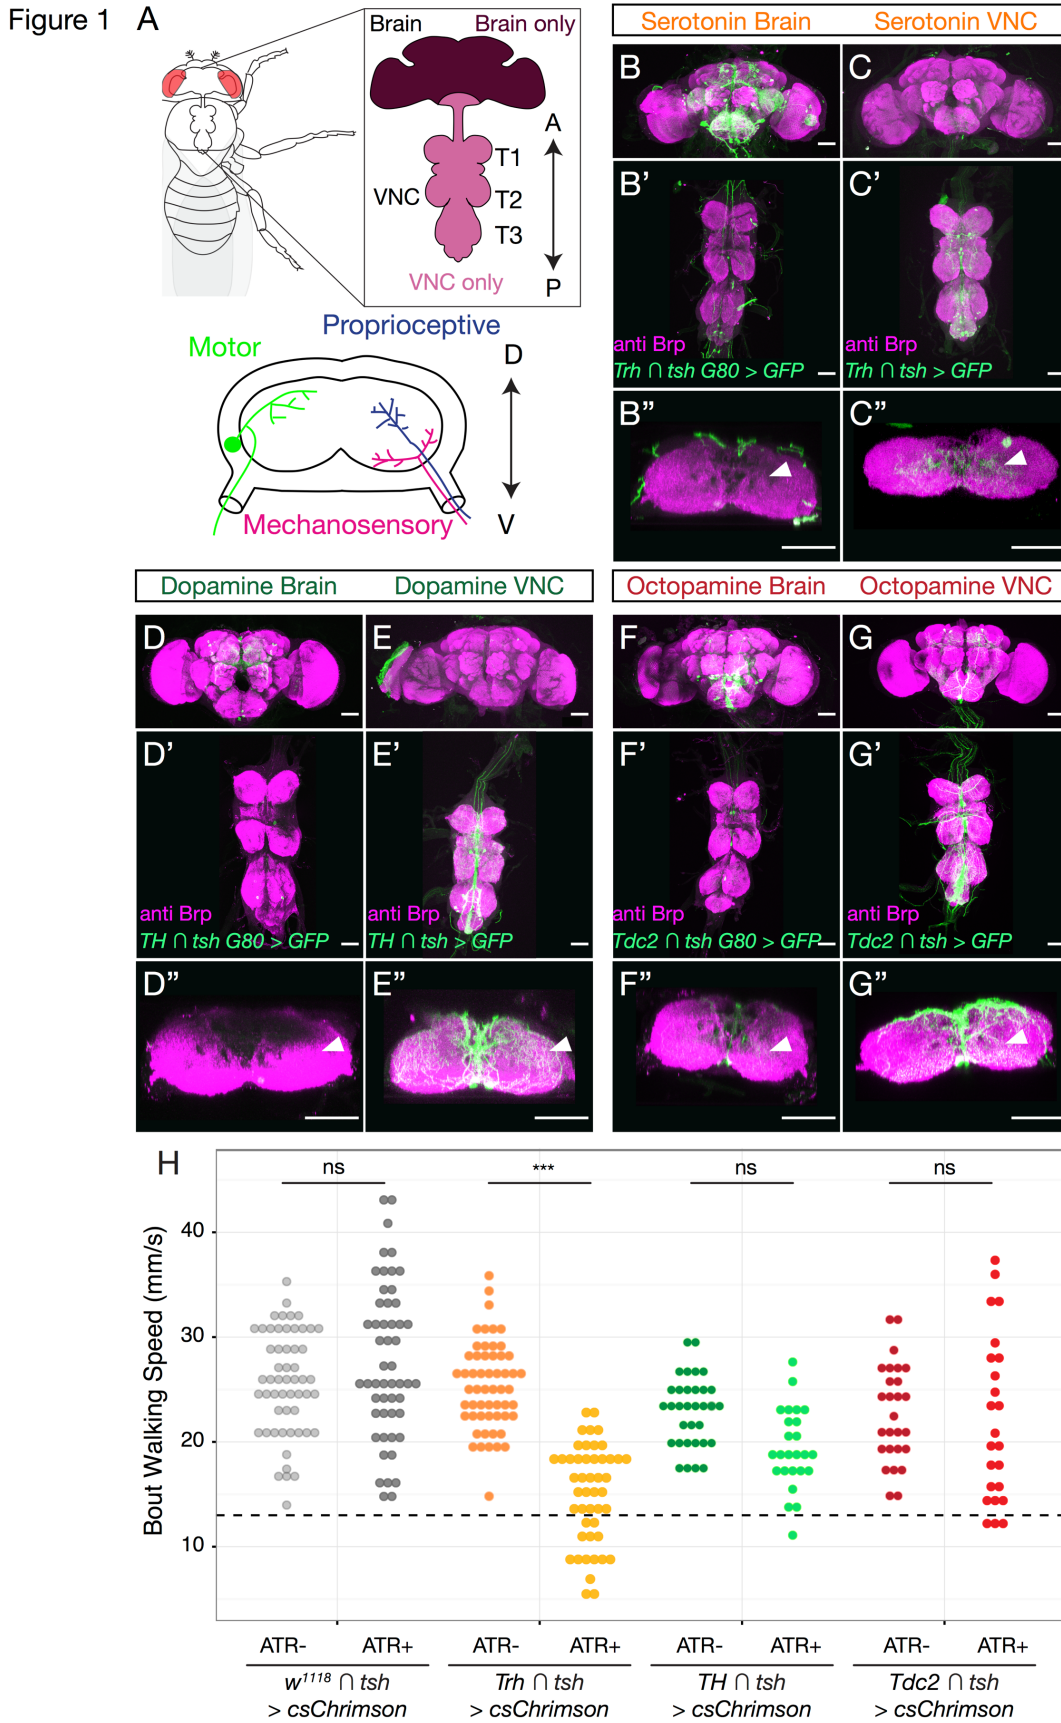

103 **Figure 1. Neuromodulators in the fly CNS.**

104

105 **A.** The adult *Drosophila* CNS is composed of the brain and the VNC, which consists of three  
106 thoracic neuropils (T1, T2 and T3), each of which corresponds to a pair of adult legs, and an  
107 abdominal ganglion. Anterior-posterior axis specified. *Lower panel:* Each thoracic neuropil  
108 contains the projections of locomotor circuit components, including motor neurons that send  
109 axons to leg muscles and sensory neurons that convey mechanosensory and proprioceptive  
110 information from the legs (schematized here in cross section). Dorsal – ventral axis specified.

111

112 **B-G.** Maximum intensity projections show the expression patterns driven by Gal4 lines labeling  
113 either brain-derived (B, D, F, *Gal4* intersected with *tsh Gal80*) or VNC-derived (C, E, G, *Gal4*  
114 intersected with *tsh*) serotonergic (B-C, *Trh Gal4*), dopaminergic (D-E, *TH Gal4*), or  
115 octopaminergic/tyraminerpic (F-G, *Tdc2 Gal4*) neurons. (B''-G'') Projection of a subset of cross  
116 sections of the VNC shows innervation of the T1 neuropil. All scale bars are 50  $\mu$ m.

117

118 **H.** Optogenetic activation of serotonergic (*Trh-Gal4*) neurons in the *Drosophila* VNC, but not  
119 dopaminergic (*TH-Gal4*) or octopaminergic/tyraminerpic (*Tdc2-Gal4*) neurons, slows walking  
120 speed compared to all-trans-retinal (ATR) negative and non-Gal4 (*w<sup>1118</sup>*) controls. These  
121 activation experiments were carried out using the Flywalker assay (Mendes et al., 2013; see  
122 Figure S3A for a schematic). Statistics computed using a Kruskal-Wallis test with the Dunn-  
123 Sidak correction for multiple comparisons \* <.05 \*\*<.01 \*\*\*<.001. N walking bouts (animals)  
124 *w<sup>1118</sup>* ATR- 55 (14-31); *w<sup>1118</sup>* ATR+ 52 (14-36); *Trh* ATR- 56 (12-30); *Trh* ATR+ 47 (10-23); *TH*  
125 ATR- 33 (10-24); *TH* ATR+ 25 (10-26); *Tdc2* ATR- 27 (10-27); *Tdc2* ATR+ 24 (10-25).

126

127 **Activation of VNC serotonergic neurons slows walking speed**

128 Previous studies showed that neuromodulatory systems can regulate walking  
129 [8,25,47,49,51,54,58], but could not dissociate the relative contribution of brain and VNC  
130 neuromodulatory subpopulations. Here we addressed whether neuromodulatory neurons in the  
131 VNC alone are sufficient to modulate walking behavior. We specifically optogenetically activated  
132 these neurons and found that activation of serotonergic VNC populations, but not dopaminergic  
133 or octopaminergic/tyraminerpic VNC subpopulations, altered the average speed at which  
134 animals walk (Figure 1H).

135 Based on these results, we focused the remainder of our analysis on VNC serotonergic  
136 neurons (5-HT<sup>VNC</sup>). To validate the fidelity of our serotonergic Gal4 driver line, and to rule out  
137 co-secretion of other neurotransmitters, we performed immunostaining for markers of  
138 serotonergic (5-HT), dopaminergic (TH), octopaminergic/tyraminerpic (Tdc2), glutamaterpic  
139 (VGlut), cholinergic (ChAT), and GABAergic (GABA) neurons (Figure S1). These experiments  
140 demonstrate that the *Trh-Gal4* line drives expression in 5-HT-expressing neurons, and that  
141 these neurons do not express any of the other neurotransmitters we surveyed, suggesting that  
142 they are primarily serotonergic.

143           We next confirmed the effects of activating 5-HT<sup>VNC</sup> neurons by studying animals freely  
144 walking within an arena. This allowed us to measure not only an animal's speed, but also its  
145 walking frequency, angular velocity, and preferred position within the arena (Figure S2A-C). As  
146 with our initial experiments, activation of 5-HT<sup>VNC</sup> neurons is sufficient to produce a rapid  
147 slowing of average walking speed in this paradigm (Figure 2A). Interestingly, activation of 5-  
148 HT<sup>VNC</sup> neurons does not change the overall amount of time animals spend walking, suggesting  
149 that speed changes are not simply due to a decrease in overall activity, but instead reveal a bias  
150 towards slower walking speeds (Figure S2D and F). Unlike a previous study showing that  
151 overexpressing the serotonin transporter in all neurons caused flies to move away from the  
152 edge of the arena [46], we see no effect on the distribution of animals within the arena when we  
153 limit the activation to 5-HT<sup>VNC</sup> neurons (Figure S2D). We also find that activation of 5-HT<sup>VNC</sup>  
154 neurons decreases the absolute angular velocity of walking flies (Figure S2D). Thus, although  
155 these flies walk slower, they also walk straighter than control flies. This latter observation is  
156 unexpected, because straighter trajectories are usually correlated with faster walking speeds  
157 (Figure S2F) [10].



Figure 2

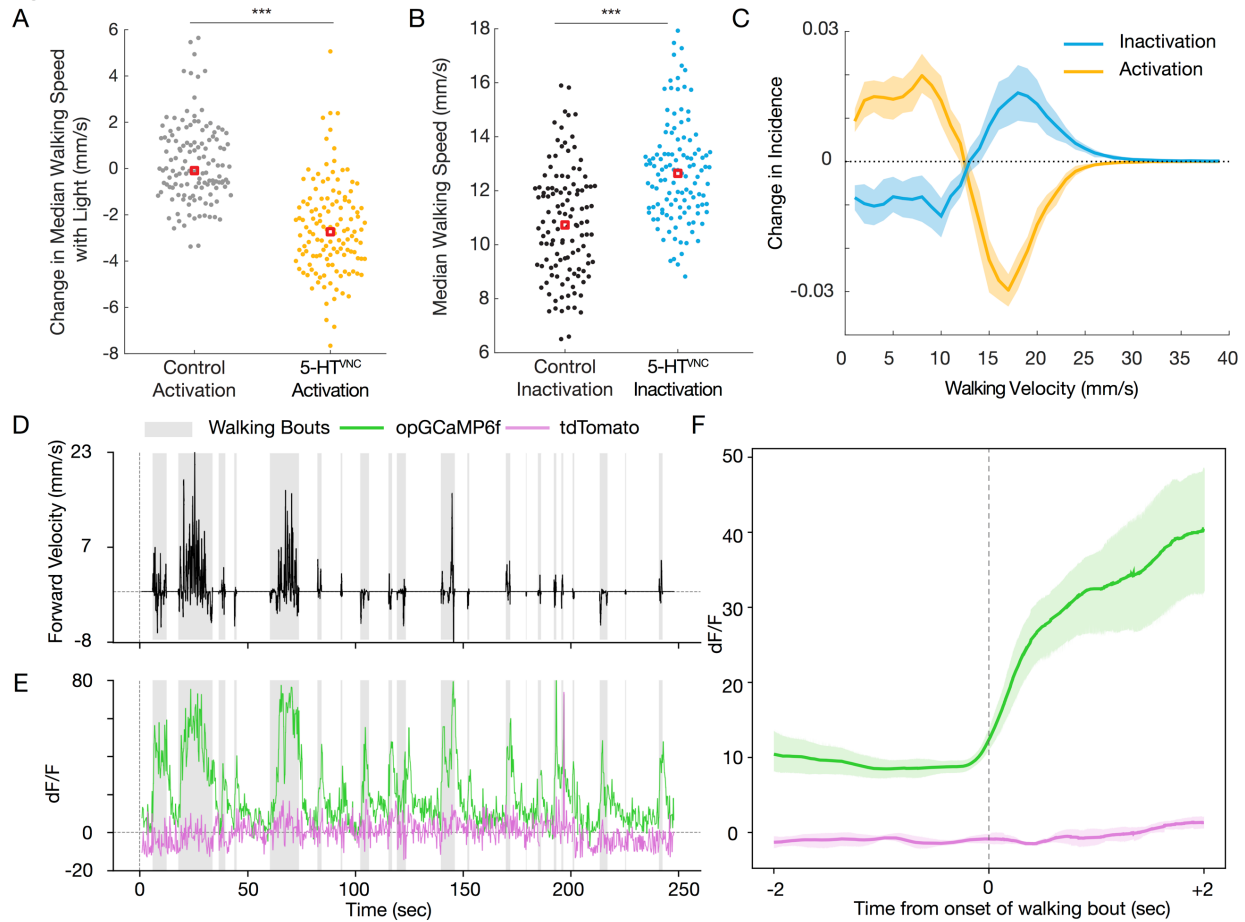

158  
159 **Figure 2. 5-HT<sup>VNC</sup> neurons modulate walking speed.**  
160

161 **A.** Activation of 5-HT<sup>VNC</sup> neurons (*Trh*  $\cap$  *tsh* > *csChrimson* fed with ATR) causes animals to walk  
162 slower than background matched non-Gal4 controls (*w<sup>1118</sup>*  $\cap$  *tsh* > *csChrimson* fed with ATR).  
163 Both genotypes were fed all-trans-retinal. Genotypes were compared using Kruskal-Wallis test,  
164 \*\*\**p*<.001. N = 130 animals for each condition.  
165

166 **B.** Inactivation of 5-HT<sup>VNC</sup> neurons (*Trh*  $\cap$  *tsh* > *Kir2.1*) causes animals to walk faster than  
167 genetically matched non-Gal4 controls (*w<sup>1118</sup>*  $\cap$  *tsh* > *Kir2.1*). Genotypes were compared using  
168 a Kruskal-Wallis test, \*\*\**p*<.001. N=119 animals per genotype.  
169

170 **C.** The distribution of velocity shifts caused by activation and inhibition of 5-HT<sup>VNC</sup> neurons are  
171 symmetrical. Differences in population average histograms were calculated between control and  
172 experimental genotypes and were fit with 95% confidence intervals via bootstrapping. For  
173 activation experiments, behavior of *w<sup>1118</sup>*  $\cap$  *tsh* > *csChrimson* flies fed with ATR was compared  
174 to that of *Trh*  $\cap$  *tsh* > *csChrimson* flies also fed with ATR for the light on period only.  
175

176 **D, E.** Serotonergic processes passing through the cervical connective (labeled using *Trh*  $\cap$  *tsh*)  
177 are active during walking. **(D)** A single animal's forward velocity with overlaid boxes showing  
178 defined walking bouts. **(E)** While tdTomato baseline signal (purple line) is not affected by  
179 walking bouts, the calcium signal (green line) in these serotonergic processes rises during  
180 walking bouts (grey boxes).

181  
182 **F.** Fluorescent signal in these processes rises with the onset of walking bouts. For each animal,  
183 all walking bouts were synchronized around their onset, and an average was taken (between 80  
184 and 130 walking bouts per animal). Plotted is the average of all animals (N=5) with a 95%  
185 confidence interval representing the spread between animals.  
186

### 187 **Flies with activated 5-HT<sup>VNC</sup> neurons walk in a coordinated manner**

188 Slower walking speeds could be the result of poor coordination or, alternatively,  
189 controlled adjustments of gaits, which occur when flies walk upside down or carry an additional  
190 load [7]. To distinguish between these two possibilities, we analyzed fly gaits using the  
191 Flywalker assay [10]. This system uses frustrated total internal reflection to visualize an animal's  
192 footprints during a walking bout and custom software to analyze these footprints, generating an  
193 array of kinematic measurements (Figure S3A) [10].

194 Using this assay, we find that activation of 5-HT<sup>VNC</sup> neurons results in highly coordinated  
195 walking patterns. Representative traces of an individual's footprints during a walking bout show  
196 that activation of these neurons does not perturb stereotyped foot placement or interfere with  
197 the straightness of the stance phase (Figure 3A and C). Step and stance traces show that these  
198 animals also use highly coordinated gaits, suggesting that interleg coordination is intact (Figure  
199 3B and D). In fact, compared to control flies, 5-HT<sup>VNC</sup> neuron activation results in more precise  
200 foot placement at the onset and offset of each stance phase, suggesting that the walking  
201 behavior of these animals is more constrained compared to control animals (Figure S3B).

202 In wild type flies, most locomotor parameters are highly correlated with speed, shifting as  
203 animals walk faster or slower. Activation of 5-HT<sup>VNC</sup> neurons induces kinematic shifts that  
204 extrapolate these relationships to speeds not normally accessed by wild type flies. For  
205 example, as animals walk slower, their step cycle frequency decreases, they take longer steps,  
206 and slow the velocity of their swinging legs. These shifts are accompanied by a shift in the step  
207 duty cycle, as stance duration increases while swing duration remains largely unchanged [10].  
208 These relationships are maintained and extended into the slower speed range when 5-HT<sup>VNC</sup>  
209 neurons are activated (Figure 3E-I).

210 In contrast to the kinematic parameters described above, the relationship between gait  
211 and speed is not a simple extrapolation upon 5-HT<sup>VNC</sup> neuron activation. For example, as  
212 animals walk more slowly, their preferred gait shifts from the three-legged tripod gait to the more  
213 stable tetrapod and wave gaits [8,10]. Upon activation of 5-HT<sup>VNC</sup> neurons, the slope of a subset  
214 of these relationships (tripod and wave gait in particular) shifts (Figure 3J and L). Thus, in

215 addition to maintaining the relationships between speed and most kinematic parameters,  
216 serotonin alters the relationship between particular types of gait choice and walking speed.  
217

Figure 3

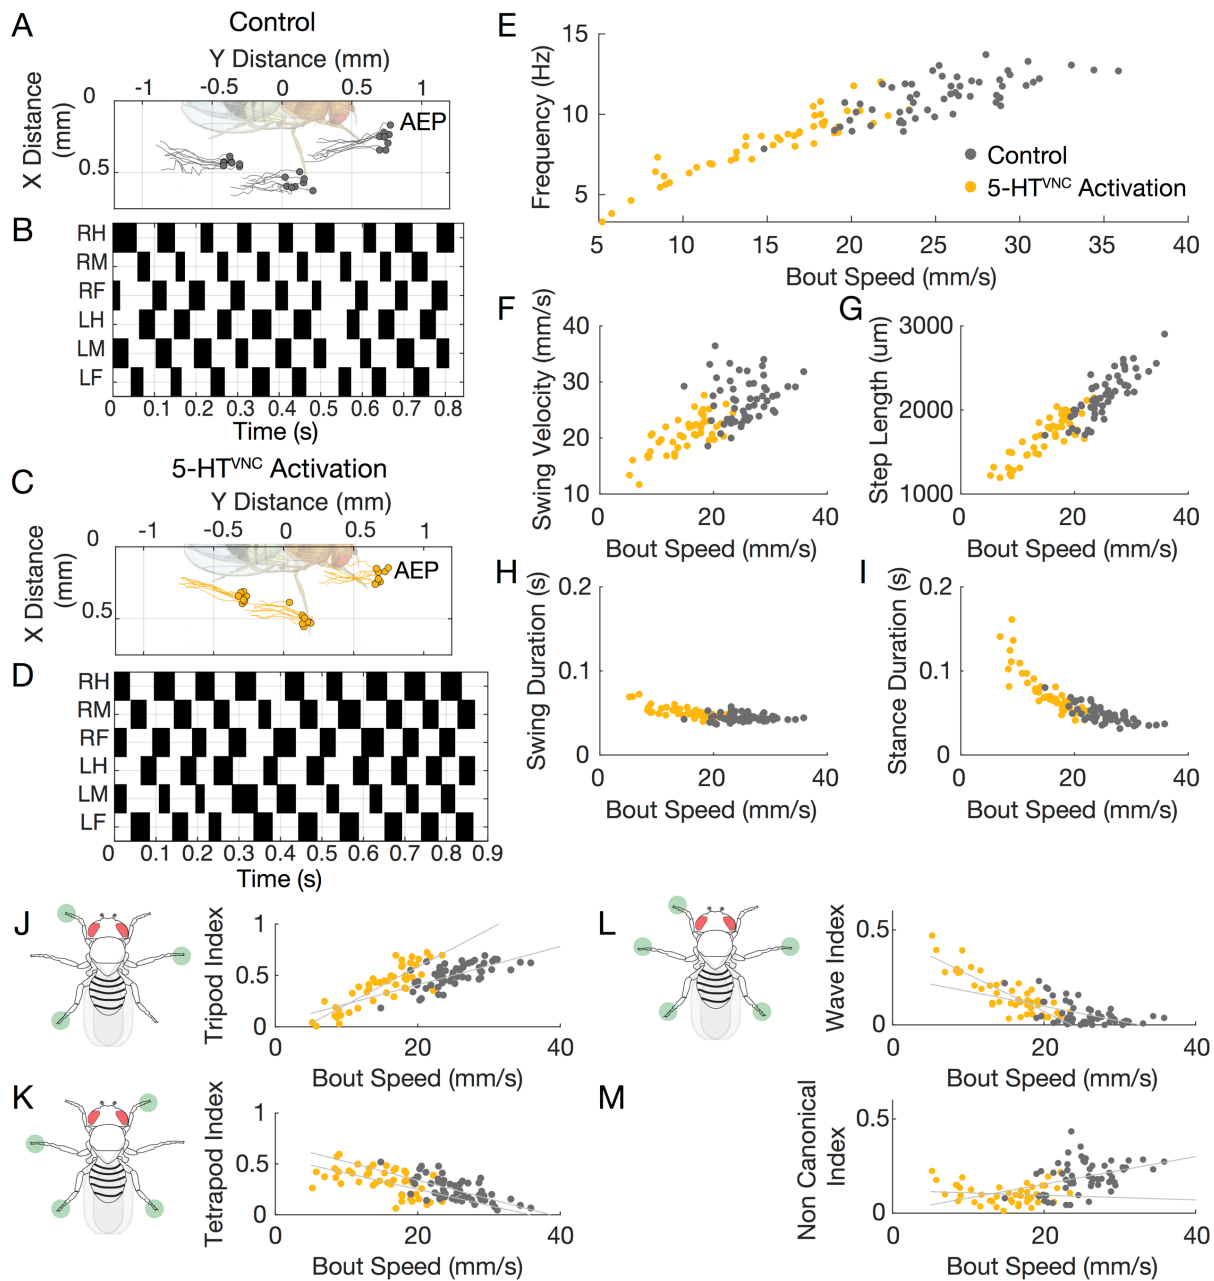

218

219 **Figure 3. Activation of 5-HT<sup>VNC</sup> neurons extrapolates most locomotor kinematics.**

220 **A-D.** Representative data from speed-matched slow (19 mm/s) walking bouts show that  
 221 activation of 5-HT<sup>VNC</sup> neurons does not disrupt locomotor coordination. Footfalls (filled circles)  
 222 and stance traces (lines) for all steps taken by the left front, middle, and hind legs show foot  
 223 touchdown placement is consistent over time and stance traces are relatively straight in both  
 224 control animals (*Trh*  $\cap$  *tsh* > *csChrimson* grown on food lacking ATR) (A) and animals where 5-  
 225 HT<sup>VNC</sup> neurons have been activated (*Trh*  $\cap$  *tsh* > *csChrimson* fed with ATR) (C). Step trace for  
 226 each leg during a walking bout for control (B) and experimental (D) animals. Stance phase is

227 indicated in white and swing phase in black. The checkerboard pattern is consistent with a  
228 highly-coordinated walking gait.

229  
230 **E-I.** Extrapolation of step parameters upon activation of 5-HT<sup>VNC</sup> neurons. The relationships  
231 between speed and frequency (E), swing velocity (F), step length (G), swing duration (H), and  
232 stance duration (I) are shifted in a manner that is consistent with normal walking speeds. N = 47  
233 bouts from 10-23 animals for *Trh*  $\cap$  *tsh* >*csChrimson* ATR+ (yellow circles). N=56 bouts from  
234 12-30 animals for *Trh*  $\cap$  *tsh* >*csChrimson* ATR- (gray circles).

235  
236 **J-M.** Activation of 5-HT<sup>VNC</sup> neurons modifies the relationship between speed and gait selection.  
237 Activation of 5-HT<sup>VNC</sup> neurons increases wave (L) and tetrapod (K) gait utilization while  
238 decreasing time spent using tripod (J) gait. There is a low frequency of non-canonical gait  
239 conformations upon activation (M).  $p < .001$  for speed by ATR interaction effect in multivariable  
240 model for tripod index and wave index. N = 47 bouts from 10-23 animals for *Trh*  $\cap$  *tsh*  
241 >*csChrimson* ATR+ (yellow circles). N=56 bouts from 12-30 animals for *Trh*  $\cap$  *tsh* >*csChrimson*  
242 ATR- (gray circles).

#### 243 244 **Inhibition of 5-HT<sup>VNC</sup> neurons increases walking speed**

245         Although the experiments described above demonstrate that activation of 5-HT<sup>VNC</sup>  
246 neurons causes flies to walk more slowly, gain-of-function experiments such as these cannot  
247 address if and in what situations these neurons are normally used to modulate walking speed.  
248 To begin to address this question, we expressed the inward rectifying potassium channel Kir2.1  
249 to constitutively inactivate 5-HT<sup>VNC</sup> neurons [59]. Although neurons were inactivated throughout  
250 development and adulthood, we did not observe a change in the number or anatomy of these  
251 neurons in the VNC, suggesting that their development is not significantly affected (Figure S2H  
252 and I).

253         Consistent with the activation phenotype, inhibition of 5-HT<sup>VNC</sup> neurons causes animals  
254 to walk faster (Figure 2B) and increases their angular velocity (Figure S2E and G). Inhibiting  
255 these neurons also increases the percentage of time that animals spend walking (Figure S2E).

256         The shifts in velocity produced by either optogenetic activation or constitutive inhibition  
257 of 5-HT<sup>VNC</sup> neurons mirror each other (Figure 2C). In both cases, ~12 mm/s is the boundary  
258 between velocities that are lost and gained due to 5-HT<sup>VNC</sup> neuron manipulation (Figure 2C).  
259 These complementary shifts in walking speed suggest that serotonin release in the VNC may  
260 serve as a switch to regulate behavioral state.

261

#### 262 **5-HT<sup>VNC</sup> neurons are active in walking flies**

263         The opposing effects on speed when 5-HT<sup>VNC</sup> neurons are activated or inhibited suggest  
264 that the activity of these neurons will co-vary with walk-stop transitions and velocity changes

265 during baseline walking. To test this prediction, we performed functional calcium imaging of a  
266 subset of 5-HT<sup>VNC</sup> axons within the VNC while flies walked on a spherical treadmill (Figure S4A)  
267 [60]. To record the largest functional signals, we focused on axons in the neck connective,  
268 which are likely derived from the subset of ascending 5-HT<sup>VNC</sup> neurons that target the brain  
269 (Figure S4B-D).

270 Activity in these fibers is highly correlated with walking (Figure 2D and E). Fluorescence  
271 signals from these cells rise dramatically at the onset of each walking bout (Figure 2F). These  
272 responses are not nearly as large when animals perform other motor behaviors, like proboscis  
273 extension or grooming (Figure S4E). These results suggest that at least a subset of 5-HT<sup>VNC</sup>  
274 neurons are specifically active when flies walk, and are not generically active during all legged  
275 motor behaviors. We also find that the activity of these serotonergic processes correlates with  
276 the average speed of the walking bout, suggesting that these neurons may become more active  
277 when animals walk faster (Figure S4F). These observations are particularly interesting in the  
278 context of our other behavioral data, which show that walking speed can be shifted faster or  
279 slower by manipulating 5-HT<sup>VNC</sup> neural activity. Thus, baseline walking speed correlates with but  
280 is also sensitive to 5-HT<sup>VNC</sup> neural activity. Taken together, these observations suggest that one  
281 role for serotonin release in the VNC may be to dampen walking speed, a conclusion that we  
282 further test below.

283

## 284 Serotonin slows baseline walking in multiple contexts

285 Results from optogenetic activation and recordings can be reconciled by a model  
286 whereby the VNC serotonergic system is used to regulate walking speed: when the system is  
287 activated, flies walk more slowly and when the system is silenced, flies walk faster. To test this  
288 model, we asked if 5-HT<sup>VNC</sup> neural activity is required when flies naturally alter their walking  
289 speeds. For example, flies normally walk at different speeds depending on ambient  
290 temperature, body orientation, nutritional status, and in response to mechanosensory  
291 stimulation [2,7,61,62]. Surprisingly, animals in which 5-HT<sup>VNC</sup> neurons were silenced were still  
292 able to adjust their speed in the same direction as wild type flies in all of these contexts (Figure  
293 4A). Moreover, regardless of the context, animals in which these neurons are silenced walk  
294 faster than controls. Thus, animals do not require 5-HT<sup>VNC</sup> neuron activity to modulate their  
295 speed in response to different environmental contexts (e.g. temperature), or internal state (e.g.  
296 hunger). Furthermore, these data suggest that this system is used in a context-independent  
297 manner to dampen walking speed.

298

299 **VNC serotonin release is required on a fast time scale to respond to rapid contextual**  
300 **changes**

301 Another scenario in which animals may benefit from slowing down is when they are  
302 startled. In mammals, stereotyped startle behaviors occur in response to a wide variety of  
303 sensory stimuli – acoustic, tactile, and vestibular. These responses take place on sub-second  
304 time scales, involve simultaneous contraction of muscles throughout the body, and are similar  
305 irrespective of the initiating stimulus [63-65]. Like mammals, *Drosophila* display stereotyped  
306 responses to threatening looming stimuli, beginning with an initial freezing period lasting less  
307 than a second before escape behaviors are initiated [66,67]. Because these startle responses  
308 are contextually independent and have been shown to be mediated in part by serotonin in  
309 mammals [68], we next asked whether 5-HT<sup>VNC</sup> neurons are required for these responses in  
310 *Drosophila*.

311 We tested this prediction using two different startle-inducing paradigms: (i) one in which  
312 flies abruptly experience total darkness ('blackout paradigm') and (ii) one in which flies suddenly  
313 experience strong mechanical stimulation, such as an intense vibration ('earthquake paradigm')  
314 [62]. In both scenarios, control animals show a two-tiered response to these abrupt changes  
315 (Figure 4B and C): First, animals rapidly come to a nearly complete stop. Then, they pause  
316 before resuming a behavior that is appropriate for the new context. For both the blackout and  
317 earthquake paradigms, control animals stop within the first 0.25 seconds, pause for about a  
318 second, and only then resume walking behavior (Figure 4B and C, Figure S5B and D). Animals  
319 lacking the ability to release serotonin in the VNC are deficient in these initial responses, but are  
320 still able to eventually achieve context-appropriate walking speeds (Figure 4A). Moreover,  
321 consistent with our earlier analyses, flies unable to activate 5-HT<sup>VNC</sup> neurons walk faster  
322 compared to control flies, both before and after the change in their environment (Figure 4B and  
323 C).

324 Taken together, these results demonstrate that the VNC serotonergic system is not  
325 required for animals to modify their walking speed in response to changes in the environment or  
326 shifts in internal state. In addition, they suggest that this system is needed for an immediate  
327 and stimulus-independent response when flies are startled.

Figure 4

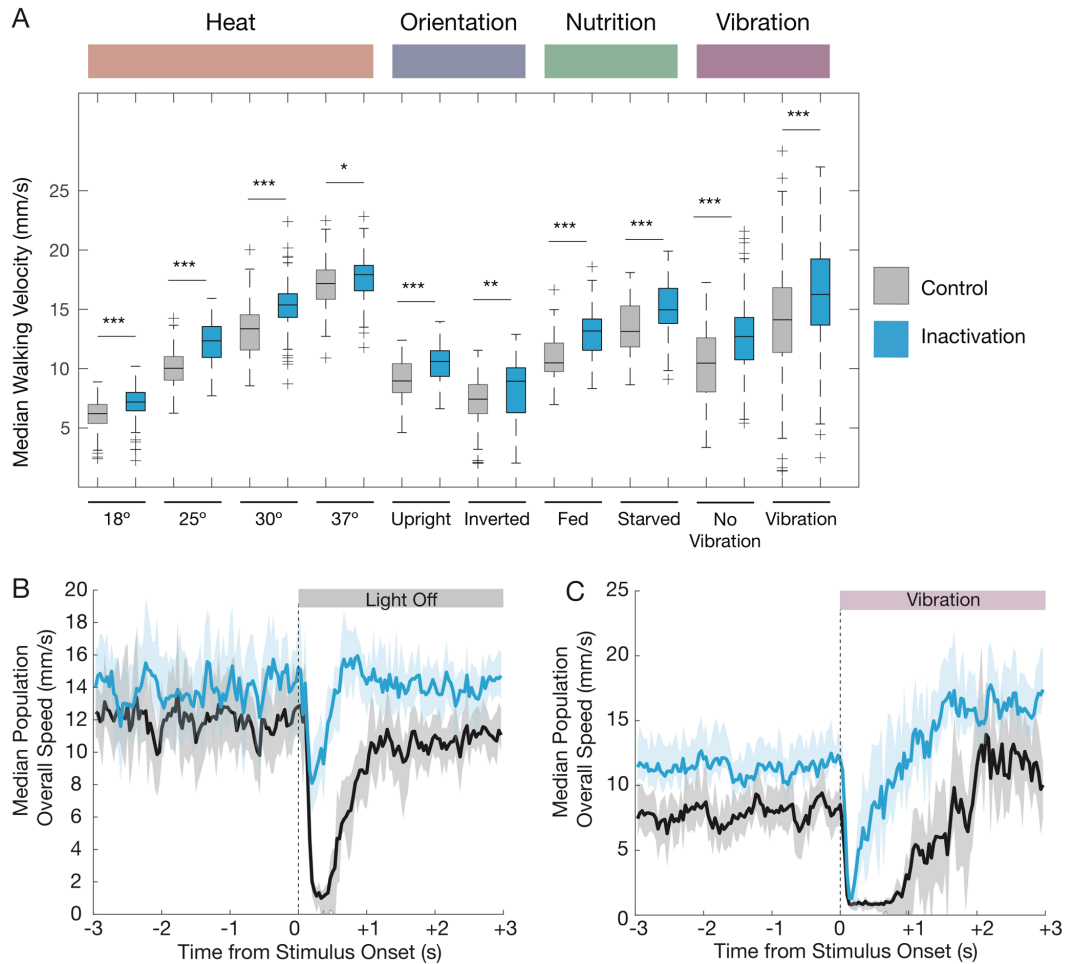

328

329 **Figure 4. Context-independent and context-specific roles of serotonin in locomotion.**

330 **A.** Silencing 5-HT<sup>VNC</sup> neurons (*Trh*  $\cap$  *tsh* > *Kir2.1*) causes an increase in walking speed  
 331 compared to genetically background matched non-Gal4 controls (*w<sup>1118</sup>*  $\cap$  *tsh* > *Kir2.1*) across a  
 332 diversity of behavioral contexts including variations of temperature, orientation, nutritional state,  
 333 and vibration stimuli. For each condition, genotypes were compared using a Kruskal-Wallis test,  
 334 \*\*\*p < .001, \*\*p < .01, \*p < .05. 18 °C – N=130 per genotype. 25 °C – N = 120 per genotype. 30 °C –  
 335 N = 120 per genotype. 37 °C – N= *w<sup>1118</sup>* (120) *Trh* (119). Upright – N = 90 per genotype.  
 336 Inverted – N=90 per genotype. Fed – N=86 per genotype. Starved – N = 86 per genotype.  
 337 Vibration – N= *w<sup>1118</sup>* (167) *Trh* (166).  
 338

339 **B-C.** Silencing 5-HT<sup>VNC</sup> neurons changes the immediate behavioral responses to sudden  
 340 contextual changes. When lights switch from on to off (B), control animals (*w<sup>1118</sup>*  $\cap$  *tsh* > *Kir2.1*,  
 341 shown in black) show a brief behavioral pause (indicated by arrow) and then resume activity.  
 342 However, when 5-HT<sup>VNC</sup> neurons are silenced, animals slow their speed but do not fully pause.  
 343 In response to the onset of vibration (C) control animals stop, pause and then accelerate speed.  
 344 When 5-HT<sup>VNC</sup> neurons are silenced (*Trh*  $\cap$  *tsh* > *Kir2.1*, shown in blue), animals pause but re-



345 accelerate more quickly than controls. Shaded areas show 95% confidence intervals. For light  
346 experiments, N=  $w^{1118}$  (150) *Trh* (140); for vibration experiments N=  $w^{1118}$  (167) *Trh* (166).  
347

#### 348 **Different serotonin receptor mutants alter the startle response in different ways**

349 All five serotonergic receptors in *Drosophila* – 5-HT1A, 5-HT1B, 5-HT2A, 5-HT2B, and  
350 5-HT7 – are G-protein coupled receptors (GPCRs) [69-72]. Like their mammalian orthologs,  
351 members of each serotonin receptor family (1, 2, and 7) have distinct cellular effects upon  
352 activation. Receptors in the 1 family, 5-HT1A and 5-HT1B, act through the G<sub>i</sub> pathway to inhibit  
353 the generation of cAMP, whereas 5-HT7, the only member of the 7 family in *Drosophila*,  
354 stimulates the production of cAMP [70,73]. Receptors of the 2 family, 5-HT2A and 5-HT2B in  
355 *Drosophila*, act through a the PLC-IP<sub>3</sub> signaling pathway to increase intracellular calcium  
356 [72,74,75]. Together, this diversity of receptors is thought to allow serotonin to produce complex  
357 physiological responses that depend on both synaptic connectivity and receptor expression  
358 patterns.

359 Before characterizing the phenotypes of these receptor mutants, we analyzed a mutant  
360 of the *Trh* gene (*Trh*<sup>01</sup>), which is globally unable to produce serotonin [48]. Reassuringly, *Trh*<sup>01</sup>  
361 animals show a similar phenotype to animals in which 5-HT<sup>VNC</sup> neurons were silenced: the flies  
362 walk significantly faster and more frequently than controls, and exhibit a similar startle response  
363 in the earthquake paradigm (Figure 5A and B, Figure S5A,C-F). In addition, *Trh*<sup>01</sup> mutant  
364 animals walk closer to the edge of the arena compared to control animals, consistent with  
365 previous observations [46] (Figure S5A).

366 Null receptor mutants *5-HT1A*<sup>Gal4</sup>, *1B*<sup>Gal4</sup>, *2A*<sup>Gal4</sup>, and *7*<sup>Gal4</sup> all increase the percentage of  
367 time animals spend walking (Figure S5A) [48]. However, an increase in walking speed is only  
368 observed in *5-HT7*<sup>Gal4</sup> mutants (Figure 5A and C), suggesting that 5-HT7 is the primary receptor  
369 responsible for mediating the effects of serotonin on walking speed.

370 We next tested the receptor mutants in the earthquake paradigm. Interestingly, *5-HT7*<sup>Gal4</sup>  
371 and *5-HT1B*<sup>Gal4</sup> mutants closely phenocopy the startle response seen in *Trh*<sup>01</sup> mutants and also  
372 in the 5-HT<sup>VNC</sup> inactivation experiments (Figure 5C and D, Figure S5E-H). By contrast, although  
373 *5-HT1A*<sup>Gal4</sup> and *5-HT2A*<sup>Gal4</sup> mutants speed up at the same rate as controls, they exhibit a  
374 sustained decrease in their final target speed in response to this stimulus (Figure 5E and F,  
375 Figure S5E, I, and J).

376 These data are consistent with the idea that different receptors influence distinct aspects  
377 of the startle response. Notably, mutation of receptors that are predicted to have opposing

378 effects on cAMP production, such as 5-HT<sub>1A</sub> and 5-HT<sub>7</sub>, can result in similar phenotypes.  
379 Further, some receptor mutants exhibit phenotypes that are not seen in *Trh*<sup>01</sup> mutant animals.  
380 These complex changes in locomotor behavior may be explained by the differential expression  
381 of serotonin receptors in key components of the locomotor circuit.

Figure 5

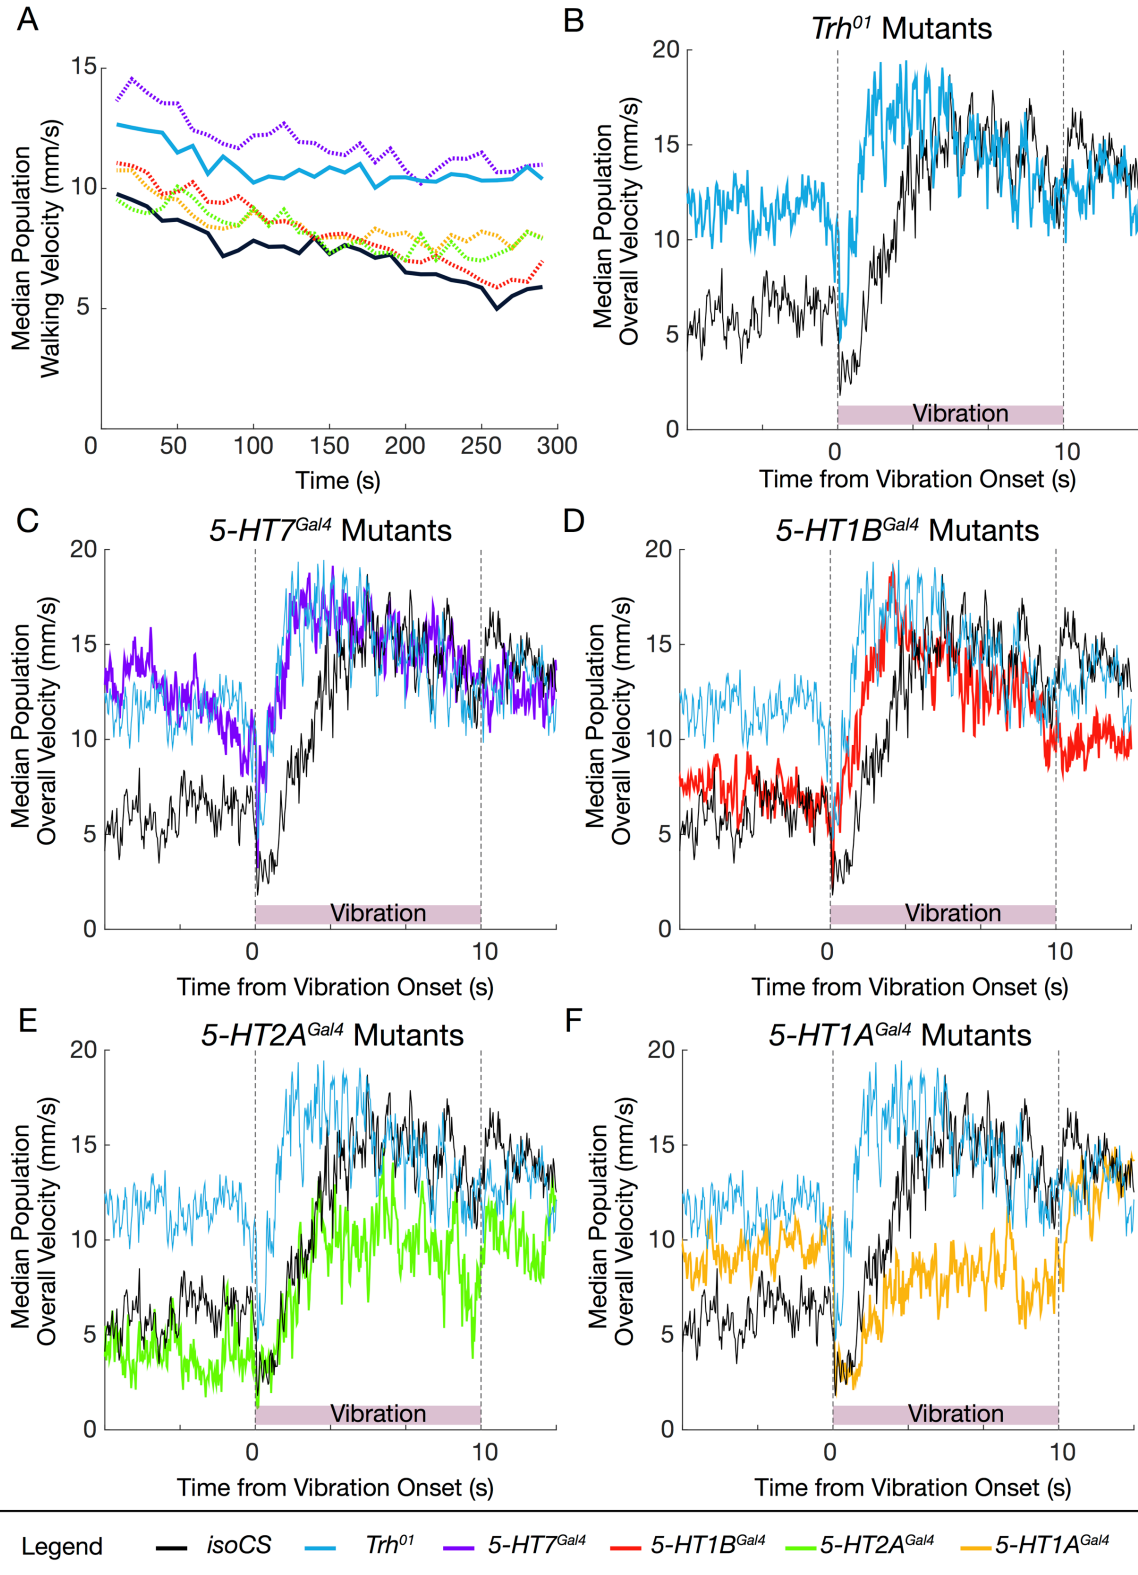

382

383 **Figure 5. Mutations in *Trh* and select serotonin receptors replicate 5-HT<sup>VNC</sup> inactivation**

384 **phenotype.**

385 **A.** Median population walking speed binned at ten second intervals for *Trh*<sup>01</sup> mutants (blue),  
386 which walk faster than background matched *isoCS* controls (black), consistent with the  
387 inactivation experiments. *5-HT7*<sup>Gal4</sup> mutants (purple) replicates this phenotype, but other  
388 mutants do not show a baseline increase in walking speed. N=130 *isoCS*, N=130 *5-HT1A*<sup>Gal4</sup>,  
389 N=120 *5-HT1B*<sup>Gal4</sup>, N=100 *5-HT2A*<sup>Gal4</sup>, N=120 *5-HT7*<sup>Gal4</sup>, N=120 *Trh*<sup>01</sup>.

390  
391 **B-F.** Median population walking speed sampled at 30 Hz in response to vibration stimulus. *Trh*<sup>01</sup>  
392 mutants (B, blue line) show a blunted and shortened pause in response to novel stimulus. *5-*  
393 *HT7*<sup>Gal4</sup> mutants (C, purple line) and *5-HT1B*<sup>Gal4</sup> mutants (D, red line) show a similar phenotype  
394 to *Trh*<sup>01</sup> mutants (blue line). *5-HT2A*<sup>Gal4</sup> mutants (E, green line) and *5-HT1A*<sup>Gal4</sup> mutants (F,  
395 yellow line) have a pause phase comparable to controls, but do not accelerate as much in  
396 response to the vibration stimulus.

397  
398 **Serotonin receptors are expressed in distinct cell types**

399 The different effects on walking observed in flies mutant for different serotonin receptors  
400 suggest that, in addition to distinct biochemical properties, they also have different expression  
401 patterns within the locomotor circuit. To identify neurons that express these receptors, we used  
402 gene and protein trap Gal4 lines from the MiMIC library to drive expression of a GFP reporter in  
403 the pattern of each receptor subtype [76] (Figure S6G). Each receptor line drove expression in  
404 many neurons both within the brain and the VNC (Figure 6A-E). Many of these are  
405 uncharacterized interneurons that cannot yet be functionally studied. However, each serotonin  
406 receptor is also expressed in distinct subsets of leg motor and sensory neurons. In particular,  
407 while members of the 5-HT1 family are predominantly expressed in mechanosensory neurons  
408 throughout the leg, 5-HT2 and 5-HT7 receptors are expressed in proximal-targeting flexor and  
409 extensor motor neurons (Figure S6A-F), proprioceptive, and distal sensory neuron populations  
410 (Figure 6F-K). Thus, serotonin release in the VNC is likely to differentially affect these  
411 components of the locomotor circuit, ultimately contributing to the observed changes in  
412 behavior.

Figure 6

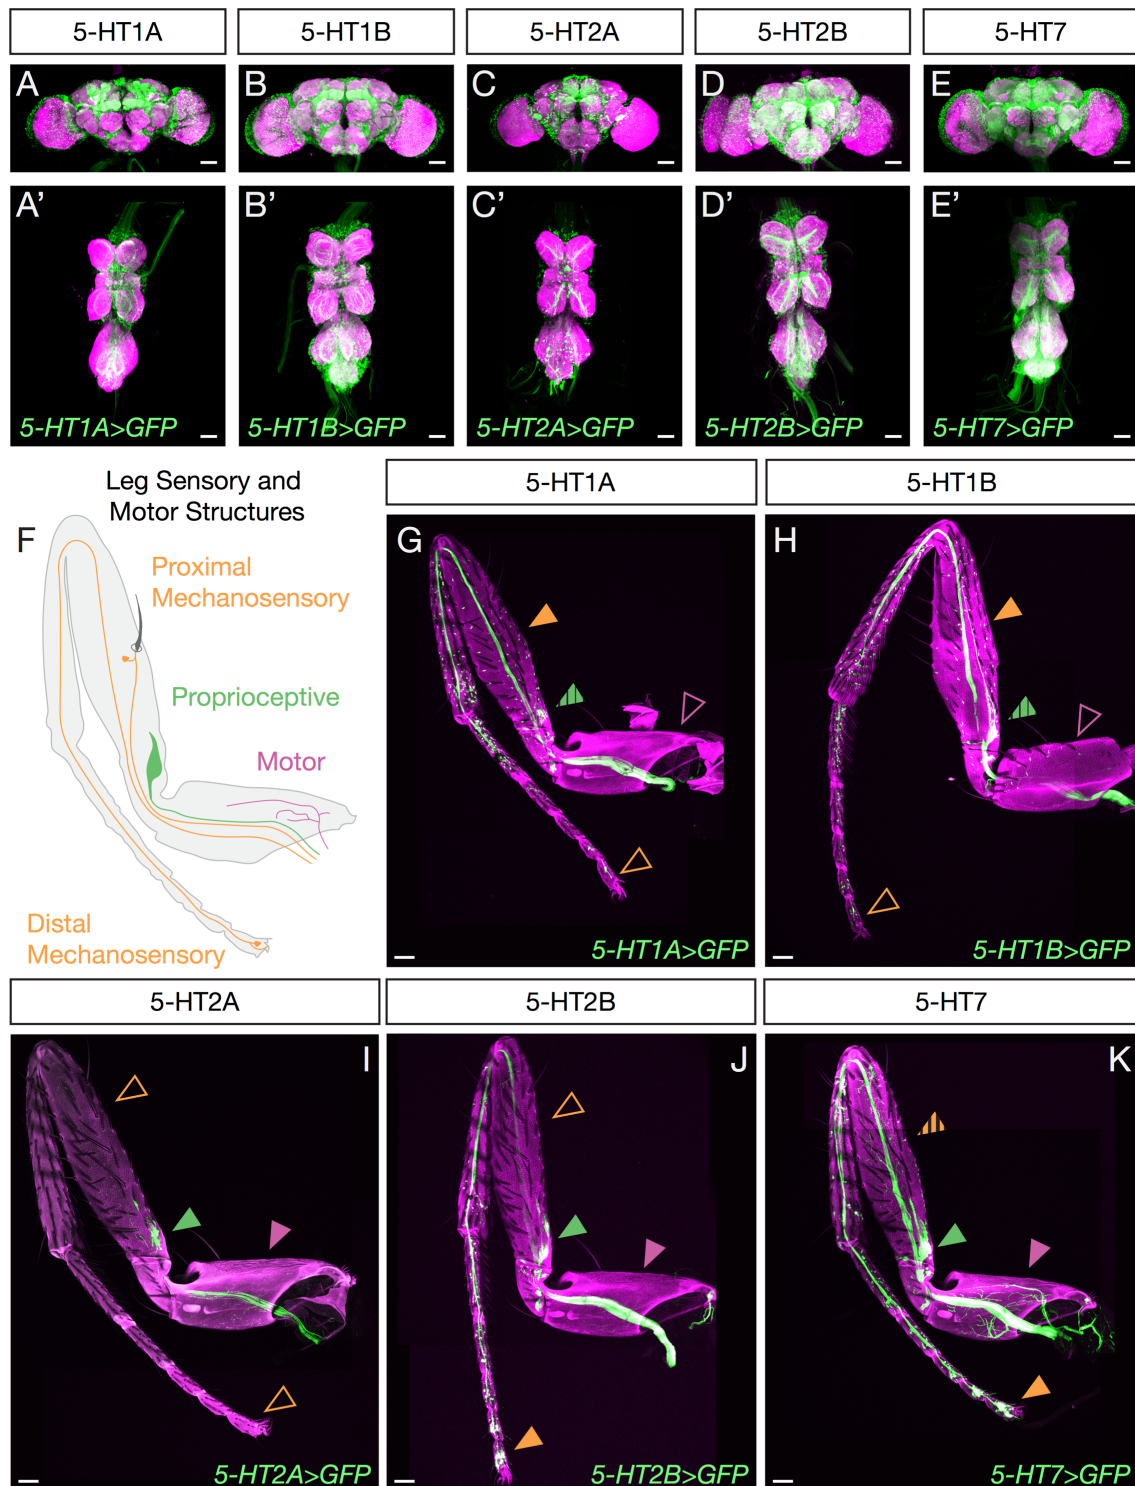

413

414 **Figure 6. Serotonin receptors are differentially expressed in locomotor circuitry**  
415 **components, including sensory and motor neurons.**

416 **A-E.** Maximum intensity projections show Gal4-driven expression of serotonin receptors in both  
417 the brain and VNC. All scale bars are 50  $\mu\text{m}$ .

418

419 **F.** Schematic of sensory and motor neuron populations innervating the adult leg.

420

421 **G-K.** Maximum intensity projections show Gal4-driven expression of serotonin receptors in  
422 neuronal processes in the adult T1 leg. Each receptor is expressed in a distinct pattern in  
423 sensory-motor components. While some are expressed in motor neurons (purple arrows,  
424 hatched arrows indicate limited or weak expression) and proprioceptive neurons (green arrows),  
425 others are not. All receptors are expressed in a subset of mechanosensory neurons (orange  
426 arrows), but some are preferentially expressed in proximal or distal leg segments. All scale bars  
427 are 50  $\mu\text{m}$ .

428

## 429 **Discussion**

430 Walking is highly stereotyped, consisting of a small number of well-defined gaits, each  
431 with its own set of characteristic kinematic parameters. However, these highly stereotyped gaits  
432 must also be flexible, to adapt to a wide variety of environments, complex terrains, and novel  
433 situations. How nervous systems manage to orchestrate behaviors that are simultaneously  
434 stereotyped and flexible is not well understood. Here we show in the fly that (i) serotonergic  
435 VNC neural activity modulates walking speed in a context-independent manner and (ii) these  
436 neurons play a critical role in a fly's ability to modulate its walking behavior in response to the  
437 sudden onset of a startling stimulus. Moreover, the multiple roles the serotonergic system plays  
438 are mediated by distinct receptors, which have different biochemical properties and are  
439 expressed in unique subsets of locomotor circuit components.

440

### 441 **A common role for serotonin in modulating walking speed across species**

442 A central finding of our study is that serotonergic neuron activity in the VNC modulates  
443 baseline walking speed. This finding strongly parallels previous observations in the motor  
444 systems of other organisms. For example, activity of serotonergic neurons in the cat brainstem  
445 is correlated with motor behavior and walking speed [12,77,78]. Additionally, in vertebrates as  
446 diverse as the lamprey and mouse, serotonin induces an increase in step cycle period, slowing  
447 locomotor rhythms (reviewed in [42]). One recent study in mice showed that activation of the  
448 dorsal raphe nucleus – a key serotonergic brain region – produces rapid suppression of  
449 spontaneous locomotion and locomotor speed, while showing minimal effect on kinematic  
450 parameters, such as gait, or on non-locomotor behaviors such as grooming [79]. These  
451 parallels to our results suggest that the modulatory role of the serotonergic system in regulating  
452 locomotor speed is remarkably conserved across the animal kingdom.

453

## 454 **Serotonergic modulation of the startle response**

455 In our experiments, we consistently observed that the onset of a startling stimulus (be it  
456 visual or mechanosensory), induces a brief period of pausing behavior in wild type flies. We  
457 hypothesize that these behavioral pauses are similar to startle responses seen in both  
458 mammalian systems and insects, which also trigger a pause phase before animals embark on  
459 an appropriate behavioral action [63,64,67,68,80-82]. While the importance of these pausing  
460 behaviors remains poorly understood, it may be that they allow animals to collect additional  
461 sensory information before they select an appropriate response to the startling stimulus.

462 We find that inactivation of the VNC serotonergic system does not completely abolish  
463 this startle response, suggesting that this system is not the primary driver of this behavior, but  
464 instead serves to modulate the latency of the response following an initial freeze phase when  
465 animals stop. A role for serotonin in the startle response appears to be conserved: In mammals,  
466 the absence of serotonin, due to the lesion of key serotonergic brain regions or pharmacological  
467 blockade, is generally associated with an increase in the intensity of startle responses [83,84].  
468 Although this may seem counter to our results, other studies have shown that serotonin  
469 increases startle responses when injected directly into the lumbar spinal cord [85-88]. Thus,  
470 serotonin may play distinct roles in the forebrain and in the spinal cord. Together with our  
471 results, we suggest that the role of spinal cord/VNC serotonin release is to extend the latency  
472 period and/or amplify the startle response.

473

## 474 **Serotonin acts differentially on sensory and motor circuitry to modulate walking**

475 Based on the distribution of receptors in locomotor circuitry components, we can  
476 formulate a preliminary model of how serotonergic action may be working to modulate  
477 *Drosophila* locomotor circuits both at the level of sensory input and motor output. We note,  
478 however, that this model is likely incomplete as we cannot as of now incorporate the role that  
479 local interneurons that also express 5-HT receptors play in modulating locomotion behavior.  
480 Nevertheless, because the primary receptors expressed in motor neurons are 5-HT7 and 5-  
481 HT2B, which have been shown to upregulate the production of cAMP and facilitate calcium  
482 entry [72,89], we hypothesize that the phenotypes we observe are due at least in part to  
483 serotonin action on these cells.

484           There is ample evidence in the literature to support this role for serotonin both in rodent  
485 models as well as in human studies (reviewed in [90-92]). While increased motor output is  
486 usually correlated with increased, not decreased, speed [93], increased muscle output has also  
487 been shown to be required in humans to navigate complex terrain, and may be playing a similar  
488 role in the fly [94,95]. In addition, it is noteworthy that the motor neurons expressing these  
489 receptors target both flexor and extensor muscles in the coxa and femur, two proximal leg  
490 segments (Figure S6A-F). These observations suggest that serotonin acting on these motor  
491 neurons may result in co-contraction, a mechanism that facilitates joint stability in the face of a  
492 complex environment and also during the preparatory phase for certain escape behaviors  
493 [66,94-99]

494           In addition to a potential role in motor neurons, serotonin receptors are expressed in  
495 distinct classes of leg sensory neurons that target the leg neuropils of the VNC. We hypothesize  
496 that this distribution of receptors serves to shift the balance of sensory information in response  
497 to serotonergic input. Based on the known downstream signaling properties of these receptors,  
498 we predict that increased levels of serotonin in the VNC would amplify proprioceptive and distal  
499 sensory inputs at the expense of more proximal sensory information. These shifts in sensory  
500 processing may also contribute to increased stability and might be useful in other contexts  
501 where slow walking is preferred, such as navigating complex terrains where improved sensory  
502 information might be beneficial.

503           Considering the broad expression of serotonergic receptors in sensory organs, it is  
504 interesting that one of the behavioral roles of serotonin we identified is its ability to mediate the  
505 response to vibration. Vibration is sensed by the chordotonal organ, and our expression  
506 analysis reveals that serotonin receptors are expressed to different extents in chordotonal  
507 neurons [100-102]. Together, these observations suggest that modulation of sensory  
508 information as it is entering the VNC plays a key role in how serotonin modulates the response  
509 to a vibration stimulus. In addition, the observation that serotonin release in the VNC affects the  
510 response to both the earthquake and blackout paradigms similarly, which are perceived by two  
511 very different sensory systems, suggests that this neuromodulator is controlling downstream  
512 locomotor components, such as motor neurons, that are shared by both systems.

513

## 514 **Experimental Procedures**

### 515 **Fly husbandry:**

516



517 Unless otherwise described, flies were maintained at 25° C on dextrose cornmeal food using  
 518 standard laboratory techniques. Crosses used for behavioral experiments were flipped every 2-  
 519 3 days to prevent overcrowding. For all arena experiments, flies were maintained on Nutrifly  
 520 German Sick food (Genessee Scientific 66-115) in an incubator humidified at 60% with a  
 521 12h:12h light:dark cycle. As animals eclosed, females of the appropriate genotype were  
 522 collected under CO<sub>2</sub> anesthesia every 2-3 days. For non-optogenetic experiments, flies were  
 523 collected onto Nutrifly Food without any additive. For optogenetic experiments, flies were  
 524 collected onto Nutrifly food supplemented with either .4 mM ATR or an equal concentration of  
 525 solvent alone (DMSO for Flywalker experiments, 95% EtOH for arena experiments). Animals  
 526 were aged in the dark (for optogenetic experiments) or on the same light:dark cycle for 2-3 more  
 527 days at 25° C before being assayed.

528  
 529 **Fly Strains:**  
 530

| Line                                                                 | Source                      | Reference     |
|----------------------------------------------------------------------|-----------------------------|---------------|
| + ; + ; <i>Trh Gal4</i>                                              | BL 38389                    | [55]          |
| + ; + ; <i>TH Gal4</i>                                               |                             | [56]          |
| + ; <i>Tdc2 Gal4</i> ; +                                             |                             | [57]          |
| <i>w<sup>1118</sup></i> ; <i>Iliso</i> ; <i>Illiso</i>               | BL 5905                     | [103]         |
| <i>w<sup>1118</sup></i> ; <i>Iliso</i> ; <i>Trh-Gal4</i>             | This study                  |               |
| <i>w<sup>1118</sup></i> ; <i>Iliso</i> ; <i>TH-Gal4</i>              | This study                  |               |
| <i>w<sup>1118</sup></i> ; <i>Tdc2 Gal4</i> ; <i>Illiso</i>           | This study                  |               |
| <i>w<sup>1118</sup></i> ; <i>Iliso</i> ; <i>Trh iso Gal4</i>         | This study – 10x outcrossed |               |
| + ; <i>UAS-mCD8::GFP</i> ; +                                         | BL                          |               |
| <i>tub&gt;gal80&gt;</i> ; <i>tsh-LexA</i> ,<br><i>LexAop-Flp</i> ; + | Marta Zlatic                | Kristin Scott |
| + ; <i>tsh-Gal80</i> ; +                                             | Julie Simpson               |               |
| + ; + ; <i>UAS-<br/>csChrimson::mVenus</i>                           | BL 55136                    | [104]         |
| + ; + ; <i>UAS-Kir2.1</i>                                            | BL 6595                     | [59]          |
| + ; + ; <i>20XUAS-hexameric-<br/>GFP</i>                             | Steve Stowers               | [105]         |
| + ; <i>UAS-OpGCamp6f</i> ; <i>UAS-<br/>tdTomato</i>                  | Pavan Ramdya                | [60]          |
| <i>IsoCS</i>                                                         | Yi Rao                      | [48]          |
| <i>w+</i> ; <i>5-HT1A<sup>Gal4</sup></i> ; +                         |                             |               |
| <i>w+</i> ; <i>5-HT1B<sup>Gal4</sup></i> ; +                         |                             |               |
| <i>w+</i> ; + ; <i>5-HT2A<sup>Gal4</sup></i>                         |                             |               |
| <i>w+</i> ; + ; <i>5-HT7<sup>Gal4</sup></i>                          |                             |               |
| <i>w+</i> ; + ; <i>Trh<sup>01</sup></i>                              |                             |               |
| <i>5-HT1A-Gal4 (MI04464)</i>                                         | Herman A. Dierick           | [76]          |
| <i>5-HT1B-Gal4 (MI05213)</i>                                         |                             |               |
| <i>5-HT2A-Gal4 (MI00459)</i>                                         |                             |               |
| <i>5-HT2A-Gal4 (MI03299)</i>                                         |                             |               |
| <i>5-HT2B-Gal4 (MI05208)</i>                                         |                             |               |
| <i>5-HT2B-Gal4 (MI06500)</i>                                         |                             |               |
| <i>5-HT2B-Gal4 (MI07403)</i>                                         |                             |               |
| <i>5-HT7-Gal4 (MI00215)</i>                                          |                             |               |

|                                                                                                                                                                                   |              |  |
|-----------------------------------------------------------------------------------------------------------------------------------------------------------------------------------|--------------|--|
| <i>Vglut</i> >> <i>LexAVP16, LexO-CD8GFP /FM7</i> ;<br><i>Vglut</i> >> <i>LexAVP16, UASFlp, LexO-CD8GFP /CyO</i> ; <i>LexO-CD8GFP, LexO-CD8GFP, Vglut</i> >> <i>LexAVP16 /TM2</i> | Myungin Baek |  |
| + ; <i>MHC::RFP</i> ; +                                                                                                                                                           | BL 38464     |  |

531  
532  
533

### Genotypes with associated Figures

| Experimental Line                                                                                                 | Main Figure      | Supplementary             |
|-------------------------------------------------------------------------------------------------------------------|------------------|---------------------------|
| + /+ ; <i>tsh Gal80 / UAS mCD8 GFP</i> ; <i>Trh Gal4 / +</i>                                                      | 1B, B', B''      |                           |
| <i>tub&gt;gal80&gt; / + ; tsh LexA, lexAop Flp / + ; Trh Gal4 / UAS mCD8 GFP</i>                                  | 1C, C', C''      |                           |
| + /+ ; <i>tsh Gal80 / + ; UAS mCD8 GFP, TH Gal4 / +</i>                                                           | 1D, D', D''      |                           |
| <i>tub&gt;gal80&gt; / + ; tsh LexA, lexAop Flp / + ; TH Gal4, UAS mCD8 GFP / +</i>                                | 1E, E', E''      |                           |
| + /+ ; <i>tsh Gal80 / Tdc2 Gal4 ; UAS mCD8 GFP / +</i>                                                            | 1F, F', F''      |                           |
| <i>tub&gt;gal80&gt; / + ; tsh LexA, lexAop Flp / Tdc2 Gal4 ; UAS mCD8 GFP / +</i>                                 | 1G, G', G''      |                           |
| <i>tub&gt;gal80&gt; / w<sup>1118</sup> ; tsh LexA, lexAop Flp / isoII ; UAS csChrimson::mVenus / isoIII</i>       | 1H<br>2A, C      | S2D, F                    |
| <i>tub&gt;gal80&gt; / w<sup>1118</sup> ; tsh LexA, lexAop Flp / isoII ; UAS csChrimson::mVenus / Trh Gal4</i>     | 1H<br>3A-M       | S3 B<br>S4 D              |
| <i>tub&gt;gal80&gt; / w<sup>1118</sup> ; tsh LexA, lexAop Flp / isoII ; UAS csChrimson::mVenus / TH Gal4</i>      | 1H               |                           |
| <i>tub&gt;gal80&gt; / w<sup>1118</sup> ; tsh LexA, lexAop Flp / Tdc2 Gal4 ; UAS csChrimson::mVenus / isoIII</i>   | 1H               |                           |
| <i>tub&gt;gal80&gt; / w<sup>1118</sup> ; tsh LexA, lexAop Flp / isoII ; UAS csChrimson::mVenus / Trh iso Gal4</i> | 2A, C            | S1<br>S2D, F, H, I        |
| <i>tub&gt;gal80&gt; / w<sup>1118</sup> ; tsh LexA, lexAop Flp / isoII ; UAS Kir2.1::GFP / isoIII</i>              | 2B and C<br>4A-C | S2E and G                 |
| <i>tub&gt;gal80&gt; / w<sup>1118</sup> ; tsh LexA, lexAop Flp / isoII ; UAS Kir2.1::GFP / Trh iso Gal4</i>        | 2B and C<br>4A-C | S2E, G, H, I<br>S5D and F |

|                                                                                                                                                                      |       |              |
|----------------------------------------------------------------------------------------------------------------------------------------------------------------------|-------|--------------|
| <i>tub&gt;gal80&gt;/+ ; tsh-LexA, lexAop-FLP/UAS-opGCaMP6f; Trh-Gal4/UAS-tdTomato</i>                                                                                | 2D-F  | S4B, C, E, F |
| <i>isoCS</i>                                                                                                                                                         | 5A-F  | S5A,C, E     |
| <i>W+ ; 5-HT1A<sup>Gal4</sup> ; +</i>                                                                                                                                | 5A, F | S5A,C,J      |
| <i>W+ ; 5-HT1B<sup>Gal4</sup> ; +</i>                                                                                                                                | 5A, D | S5A,C,H      |
| <i>W+ ; + ; 5-HT2A<sup>Gal4</sup></i>                                                                                                                                | 5A, E | S5A,C,I      |
| <i>W+ ; + ; 5-HT7<sup>Gal4</sup></i>                                                                                                                                 | 5A, C | S5A,C,G      |
| <i>W+ ; + ; Trh<sup>01</sup></i>                                                                                                                                     | 5A-F  | S5A,C-J      |
| <i>5-HT1A-Gal4 (MI04464) / + ; 20X-UAS hexameric GFP / +</i>                                                                                                         | 6A,G  | S6G          |
| <i>5-HT1B-Gal4 (MI05213) / + ; 20X-UAS hexameric GFP / +</i>                                                                                                         | 6B,H  | S6G          |
| <i>+/+ ; 5-HT2A-Gal4 (MI00459) / 20X-UAS hexameric GFP</i>                                                                                                           | 6C,I  | S6G          |
| <i>+/+ ; 5-HT2B-Gal4 (MI05208) / 20X-UAS hexameric GFP</i>                                                                                                           | 6D, J | S6G          |
| <i>+/+ ; 5-HT7-Gal4 (MI0215) / 20X-UAS hexameric GFP</i>                                                                                                             | 6E, K | S6G          |
| <i>+/+ ; 5-HT2A-Gal4 (MI03299) / 20X-UAS hexameric GFP</i>                                                                                                           |       | S6G          |
| <i>+/+ ; 5-HT2B-Gal4 (MI06500) / 20X-UAS hexameric GFP</i>                                                                                                           |       | S6G          |
| <i>+/+ ; 5-HT2B-Gal4 (MI07403) / 20X-UAS hexameric GFP</i>                                                                                                           |       | S6G          |
| <i>Vglut&gt;&gt;LexA, LexO-CD8GFP / +; Vglut&gt;&gt;LexA, UASFlp, LexO-CD8GFP / +; LexO-CD8GFP, LexO-CD8GFP, Vglut&gt;&gt;LexAVP16 / 5-HT2B-Gal4 (MI05208)</i>       |       | S6A          |
| <i>Vglut&gt;&gt;LexA, LexO-CD8GFP / +; Vglut&gt;&gt;LexA, UASFlp, LexO-CD8GFP / +; LexO-CD8GFP, LexO-CD8GFP, Vglut&gt;&gt;LexAVP16 / 5-HT7-Gal4 (MI0215)</i>         |       | S6B          |
| <i>Vglut&gt;&gt;LexA, LexO-CD8GFP / +; Vglut&gt;&gt;LexA, UASFlp, LexO-CD8GFP / MHC-RFP; LexO-CD8GFP, LexO-CD8GFP, Vglut&gt;&gt;LexAVP16 / 5-HT2B-Gal4 (MI05208)</i> |       | S6C          |
| <i>Vglut&gt;&gt;LexA, LexO-CD8GFP / +; Vglut&gt;&gt;LexA, UASFlp, LexO-CD8GFP / MHC-RFP; LexO-CD8GFP, LexO-CD8GFP, Vglut&gt;&gt;LexAVP16 / 5-HT7-Gal4 (MI0215)</i>   |       | S6D          |

## 535 Immunostaining brain and VNC

536

537 Brains and VNCs were dissected in phosphate buffered saline with 0.3% Triton (PBST) and  
538 fixed in 4% Paraformaldehyde (PFA) for 20 minutes. Samples were washed five times for 20  
539 minutes in PBST with 0.1% Bovine serum albumin (BSA), and then blocked in PBST-BSA for  
540 one hour at room temperature, or overnight at 4° C. Samples were incubated with primary  
541 antibody diluted in PBST-BSA overnight at 4° C, and washed five times 20 minutes with PBST-  
542 BSA the next day. Samples were then incubated in secondary antibody diluted in PBST-BSA  
543 overnight at 4° C. The next day, samples were washed five times for 20 minutes in PBST, and  
544 then the liquid was replaced with Vectashield and samples were incubated overnight prior to  
545 mounting. Brains and VNCs from the same animals were mounted together, with the ventral  
546 surface of the VNC and the anterior surface of the brain facing up.

547

548 Validation of expression patterns during two photon experiments were performed as described  
549 in [60].

550

### 551 Antibodies:

552

| Antibody | Source          | Concentration | Animal | Figure         | SFig         |
|----------|-----------------|---------------|--------|----------------|--------------|
| Vglut    | Aaron DiAntonio | 1:10,000      | rb     |                | S1J          |
| 5-HT     | Sigma           | 1:1000        | rb     |                | S1E,<br>S4D' |
| TH       | Immunostar      | 1:1000        | m      |                | S1F          |
| ChAT     | DHSB            | 1:500         | m      |                | S1I          |
| Brp-c    | DHSB            | 1:20 – 1:100  | m      | 1B-G, 6A-<br>E | S4B          |
| GABA     | Sigma           | 1:1000        | rb     |                | S1H          |
| Tdc2     | Cova Labs       | 1:200         | rb     |                | S1G          |
| dsRed    | Takara Bio      | 1:1000        | rb     |                | S4 B         |

553

| Animal       | Fluorophore | Concentration | Source       |
|--------------|-------------|---------------|--------------|
| r            | Alexa 488   | 1:500         | Invitrogen   |
| rb           | Alexa 555   | 1:500         | Invitrogen   |
| m            | Alexa 647   | 1:500         | Invitrogen   |
| Goat anti rb | Cy3         | 1:400         | Jackson      |
| Goat anti m  | Alexa 633   | 1:400         | Thermofisher |

554

### 555 Confocal Imaging

556

557 Mounted brains and VNCs were imaged on a Leica TCS SP5 confocal at 20X magnification with  
558 a resolution of 1024 x 512 pixels, and at a scanning rate of 200 Hz and 3x averaging. Sections  
559 were taken at 1 um increments. Laser power and detector gain were maintained constant for  
560 the brain and VNC of the same animals, but were adjusted for optimal signal between animals.

561

562 Imaging of fixed samples following two photon live imaging experiments was performed on a  
563 Zeiss LSM 700 Laser Scanning Confocal Microscope at 20X magnification and 2X averaging,  
564 with a 0.52 X 0.52 um pixel size. Z sections were taken at 1 um intervals. As described in [60].

565

### 566 Cell Counting and Quantification

567

568 Images were analyzed in Fiji [106]. For quantification of the number of cells driven by *Trh-Gal4*  
569 in the brain and VNC, mVenus positive and 5-HT positive cell bodies were counted from five or  
570 more individual animals.

571

## 572 **Leg dissection, imaging, and image processing**

573

574 To prepare legs for imaging, fly heads and abdomens were removed, and thoraces with legs  
575 attached were fixed overnight in 4% PFA at 4° C. Carcasses were washed 5 times with 0.03%  
576 PBST, and then place in Vectashield overnight before legs were mounted. Imaging was  
577 performed on a Leica SP5 confocal at 20X and 1024 x 1024 pixel resolution with 3x averaging,  
578 with sections taken at steps of 1 um. Two PMT detectors were set to capture green fluorescent  
579 signal and the green autofluorescence of the cuticle. Laser power was adjusted independently  
580 for each line to achieve optimal visualization of structures. Images were processed in Fiji [106].  
581 Autofluorescence was subtracted from the green channel to allow for clearer visualization of leg  
582 structures.

583

## 584 **Behavioral Systems**

585

### 586 **Arena Experiments**

587

#### 588 **Hardware**

589

590 The skeleton of the system was built of 80-20 bars and acrylic plates and the arena itself was  
591 machined out of polycarbonate to the specifications published in [107]. The polycarbonate  
592 plastic arena was embedded in an aluminum plate to maintain a level surface. During  
593 experiments the arena was covered with an acrylic disc with a small hole for mouth pipetting in  
594 flies. The inside of the lid was coated in a thin layer of Fluon (Amazon, B00UJLH12A) to prevent  
595 flies from walking on the ceiling.

596

597 A Point Grey Blackfly Mono USB3 camera fitted with a Tamron 1/2" F/1.2 IR C-mount lens (B&H  
598 photo) was mounted above the arena and connected by USB 3 cable to a System 76 Leopard  
599 WS computer running Ubuntu 14.04 LTS. A Kodak 3x3" 89B Opaque IR filter (B&H photo) was  
600 placed in front of the camera detector to allow for detection of IR but not visible light.

601

602 Backlighting and optogenetic stimulation was provided by a plate of LEDs sitting under the  
603 arena. An acrylic diffuser was placed between the lighting plate and the arena. Each plate was  
604 designed with two sets of LEDs – one for IR backlighting (ledlightsworld.com SMD3528-300)  
605 and one for optogenetic or white light stimulation (superbrightLEDS.com NFLS-x-LC2 in Red or  
606 Natural White). These plates were swapped out when experiments required different color  
607 LEDs. To allow for detection of the on state of optogenetic lights, an additional IR light was  
608 wired in series with each visible light array, and placed within the field of view of the camera.

609

610 Each set of lights was powered separately by an Arduino Uno driver, allowing for modulation of  
611 light intensity via Pulse Width Modulation (PWM). Commands to set LED brightness and start  
612 and end experiments were sent to this driver using a PuTTY terminal and USB serial  
613 interface. For all the experiments described here, both IR and visible spectrum LEDs were set  
614 at 100% brightness. At the center of the arena this corresponded roughly to intensities of:

615

| Light On | Percent | Intensity | Wavelength Measured |
|----------|---------|-----------|---------------------|
| Infrared | 100     | .13 mW    | 1050 nm             |

|                  |     |        |        |
|------------------|-----|--------|--------|
|                  |     | .08 mW | 635 nm |
|                  |     | .08 mW | 535 nm |
| Infrared + Red   | 100 | .6 mW  | 635 nm |
| Infrared + White | 100 | .62 mW | 635 nm |
|                  |     | .68 mW | 535 nm |

616  
617  
618  
619  
620  
621  
622  
623  
624  
625

## Data Acquisition

All behavioral recordings were done during the three-hour morning activity peak. Prior to the experiment, the arena was leveled, the lid cleaned, and a new layer of Fluon applied. For each experiment, videos were recorded of cohorts of ten flies. For each recording session, flies were mouthpipetted into the arena through a small hole and then the arena lid was slid to move the hole out of the field of view. A blackout curtain cover (Thor Labs, BK5) was used to surround the arena, protecting it from any contaminating light.

626  
627  
628  
629  
630

Experimental protocols were programmed into the Arduino through serial communication via a PuTTY terminal. Videos were recorded at a rate of 30 frames per second and stored in a compressed “fly movie format” using custom software written by Andrew Straw at the University of Freiberg based on work previously described [108].

631  
632  
633  
634  
635  
636  
637

*Orientation experiments:* For inverted experiments, animals were introduced into the arena set-up when it was upright, and the lid of the arena was taped in place. The entire arena was manually inverted and propped up on two overturned ice buckets. Flies were either recorded upright and then inverted, for six minutes each, or in the opposite order. As no indicator was present to identify the moment of inversion, the first five minutes and the final five minutes of the video were selected as the before and after orientation switch periods.

638  
639  
640  
641

*Starvation:* 24 hours prior to behavioral assay, half of the flies were transferred to an empty tube with a wet Kim Wipe. Behavioral recordings were collected as described above and lasted for five minutes.

642  
643  
644  
645  
646

*Heat:* Heated experiments were carried out inside a walk-in temperature-controlled incubator, which was set at either 18, 25, 30, or 37 C and 40% humidity. Flies were introduced to the arena immediately after entering the temperature-controlled room, recording began immediately thereafter and lasted for five minutes.

647  
648  
649

*Light:* For experiments examining responses to light stimuli, flies were first exposed to five minutes of white light, and then a one minute period of darkness.

650  
651  
652  
653  
654  
655  
656

*Vibration:* To provide a vibration stimulus, four 3V haptic motors (1670-1023-ND, Digikey) were attached to the aluminum plate in which the arena sat using 3D printed holders. The motors were wired in series and driven by the same Arduino system driving the arena’s LED lighting array. For all experiments described, vibration was set at 10% power. The protocol for vibration experiments consisted of a brief habituation period (five minutes for inactivation experiments, 30 seconds for mutant experiments) followed by a 10 second vibration pulse and a 110 sec recovery period.

657  
658  
659

## Tracking

660 Videos were tracked using the FlyTracker software from the Caltech vision lab [109]. Prior to  
661 tracking, pixel to mm conversion was calibrated using an inbuilt GUI. One calibration file was  
662 generated for all videos taken on the same day. Background model and thresholds were  
663 adjusted to provide optimal recognition of animals and were not standardized between recording  
664 sessions. If present, the state of an indicator light was annotated by custom-written MATLAB  
665 software.

## 666 **Behavioral classifiers**

667 *Jump*: Jumps were classified as frames where the velocity of the animal exceeded 50 mm/s.

670  
671 *Walk*: Walking frames were defined using a dual threshold Schmitt trigger filter. Speed  
672 thresholds were set at 1 and 2.5 mm/s, and time thresholds were 0.1 s. Walking frames were  
673 also specified to be those in which the fly was not already engaged in a jump.

674  
675 *Stop*: Stop frames were classified as any frames where animals were not performing walking or  
676 jumping behaviors.

## 677 **Parameters**

678 *Walk Frequency*: the percent of frames classified as walking during the recording period.

680  
681 *Overall Velocity*: the median of all velocities over the recording period.

682  
683 *Walking Velocity*: the median of velocities during all frames when the animal is classified as  
684 walking.

685  
686 *Maximum Walking Velocity*: the maximum velocity an animal reaches during walking.

687  
688 *Angular velocity*: the median value of angular velocity. This parameter takes into account  
689 directionality of turning.

690  
691 *Absolute Angular Velocity*: the median of the absolute value of angular velocities. This  
692 parameter does not take into account directionality of turning.

693  
694 *Distance from Wall*: the median distance from the closest point on the arena wall during the  
695 recording period.

696  
697 *Walking bout number*: bouts were defined as contiguous frames of walking (longer than .1 s as  
698 specified in the walking classifier). The number of bouts was calculated for the entire recording  
699 period.

700  
701 *Walking bout duration*: the length of each bout was calculated, and the median of all bout  
702 lengths was taken for each animal.

703  
704 *Stop bout number and duration*: calculated as for walking bouts.

705  
706 *Jump Frequency*: the percent of time that an animal spends in the jump state as defined above.

## 707 **Statistics**

708  
709  
710

711 For optogenetic arena experiments, behavior during the five-minutes before optogenetic lights  
712 were turned on was compared to behavior for five minutes of the light on period for each  
713 individual, with a 30 second buffer period after the light was turned on to avoid contamination  
714 from behavioral reaction to the light itself. For each activation experiment, we recorded behavior  
715 from both experimental ( $Trh \cap tsh > csChrimson$ ) and control ( $w^{1118} \cap tsh > csChrimson$ ) flies.  
716 Prior to these experiments, the *Trh Gal4* line was outcrossed 10 times to our isogenized  $w^{1118}$   
717 control to ensure experimental and control backgrounds were genetically matched. For each  
718 genotype, we analyzed data from flies that had been fed with ATR, the required co-factor for  
719 optogenetic activation, and flies from the same cross that had been fed on food depleted of  
720 ATR. Figures show comparisons between ATR+ control and experimental animal behavior, as  
721 we found these populations had the most similar light off behavior pattern. However, significant  
722 differences in parameters are consistent even when all controls are included in the analysis.

723  
724 For constitutive inhibition arena experiments, behavior during the five-minute light off period was  
725 analyzed for experimental ( $Trh \cap tsh > Kir2.1$ ) and control ( $w^{1118} \cap tsh > Kir2.1$ ) flies fed on the  
726 same ATR negative food we used for optogenetic experiments. Prior to these experiments, the  
727 *Trh Gal4* line was outcrossed 10 times to our isogenized  $w^{1118}$  control to ensure experimental  
728 and control backgrounds were genetically matched.

729  
730 All analysis on data from arena experiments was performed in MATLAB using custom-written  
731 scripts. For normally distributed data, groups were compared by t-test. For non-normal data,  
732 groups were compared using Kruskal-Wallis analysis with Dunn-Sidak multiple correction  
733 testing when multiple groups were being compared. To compare changes in velocity  
734 distribution, bootstrapping was used to estimate the median difference between two genotypes  
735 and fit a 95% confidence interval around this difference.

736  
737 The statistics performed associated with particular experiments is described in the figure legend  
738 for that experiment.

739

## 740 **Flywalker Experiments**

741

### 742 **Hardware**

743

744 The Flywalker was constructed as described in [10] with modifications. The rig consists of a  
745 frame of 80/20 supporting a sheet of 6 mm Borofloat optical glass with polished edges placed  
746 over an Andor Zyla 4.2 Magapixel sCMOS camera with an AF Nikkor 24-85mm 1:2.8-4 D lens  
747 (Nikon). On each edge of the glass were placed four Luxeon Neutral White (4100K) Rebel LED  
748 on a SinkPAD-II 10mm Square Base (230 lm @ 700mA) wired in series. Each set of lights was  
749 driven by a dedicated 700mA, Externally Dimmable, BuckPuck DC Driver (Luxeon), and all four  
750 of these drivers were connected to a single power supply. Each driver was independently  
751 adjustable.

752

753 Chambers were 3D printed by Protolabs. The ceiling of the chamber was painted with Fluon  
754 mixed with india ink, to prevent flies from walking on the ceiling. Small far-red LEDs were  
755 embedded in the walls of the chamber for Chrimson optogenetic experiments (LXM3-PD01  
756 LUXEON). These lights were controlled by an Arduino driver that used pulsewidth modulation  
757 to adjust light brightness. Commands were sent to this driver using a PuTTY terminal and USB  
758 serial interface. For all the experiments described here, LEDs were set at 20% brightness.

759

### 760 **Data Acquisition**

761



762 The Flywalker was calibrated using a calibration reticle prior to use on each day. On the day of  
 763 the experiment, 2-5 day old females were mouthpipetted into a clean glass tube and allowed to  
 764 equilibrate for five minutes to get rid of as much dirt and food as possible to prevent  
 765 contamination of the glass surface. 2-3 flies were added to the chamber by mouth pipette.

766  
 767 Videos were recorded using the NIS Elements AR software. A constant region of interest was  
 768 defined such that the frame rate of recording was 226 fps. Each group of animals was recorded  
 769 for one minute. Videos were cut to select traces where flies walked straight for >6 steps without  
 770 other flies in the frame or touching the wall.

771  
 772 **Tracking**

773  
 774 Flywalker videos were automatically tracked using custom software written by Imre Bartos as  
 775 described in [10]. Tracking was then validated by eye and incorrect footprint calls were  
 776 corrected. Summary plots were then screened by eye for gross errors and for linear traces. If  
 777 traces were short (<3 traces per foot) or excessively turning, they were excluded.

778  
 779 **Parameters**

780  
 781 Behavioral parameters were calculated as described in [10]. Gait parameters were defined as  
 782 follows. Leg order in combination: LF RF LM RM LH RH. 1 indicates the leg is in stance phase,  
 783 0 indicates the leg is in swing phase.

784

| Tripod | Tetrapod | Wave   | Non-Canonical |
|--------|----------|--------|---------------|
| 100110 | 011011   | 011111 | All Other     |
| 011001 | 011110   | 101111 |               |
|        | 100111   | 110111 |               |
|        | 110110   | 111011 |               |
|        | 101101   | 111101 |               |
|        | 111001   | 111110 |               |

785  
 786 **Statistics**

787  
 788 For optogenetic Flywalker experiments, behavior was recorded for a one minute walking bout  
 789 with red light illumination. Light off conditions were not possible as the white light LEDs required  
 790 to generate fTIR signal contained the red wavelength used to activate our optogenetic tool. For  
 791 each activation experiment, we recorded behavior from both experimental (*Trh* – or other  
 792 *neuromodulatory Gal4 driver* –  $\cap$  *tsh* > *csChrimson*) and control ( $w^{1118} \cap$  *tsh* > *csChrimson*)  
 793 flies. Neuromodulatory Gal4 driver lines had not been fully isogenized prior to these  
 794 experiments, but two of three chromosomes (i.e., the chromosomes not containing the Gal4  
 795 itself) had been fully swapped out for those of our isogenized  $w^{1118}$  control. For each genotype,  
 796 we analyzed data from flies that had been fed with ATR, the required co-factor for optogenetic  
 797 activation, and flies from the same cross that had been fed on food depleted of ATR. Figures  
 798 show comparisons between ATR+ and ATR- controls, as we believe these populations provide  
 799 the best genetic control and had the most similar behavioral pattern. However, significant  
 800 differences in parameters are consistent even when all controls are included in our multivariate  
 801 model (described below).

802  
 803 Statistical analysis of Flywalker data was performed using custom scripts written in MATLAB  
 804 and R. For each walking bout, an average was calculated for every parameter across three to

805 five footprints per leg. For parameters that exponentially related to speed, the natural logarithm  
806 was taken of both the bout speed and parameter values. A multivariable regression model was  
807 then run on the data for every kinematic parameter. The formula for this model was as follows:

808  
809  $y \sim \text{speed} * \text{ATR}$

810  
811 This model was designed to analyze the effects of genotype and ATR while controlling for  
812 speed, which is the largest contributor to behavioral shifts.

813  
814 We also ran a version of this model that contained all control data, to validate our results:

815  
816  $y \sim \text{speed} * \text{Genotype} * \text{ATR}$

817  
818 To prevent model overfitting, we selected our model based on Akaike information criterion using  
819 the R step() package.

## 820 821 **Functional Imaging Experiments**

822  
823 Functional imaging experiments on *Trh*  $\cap$  *tsh*  $>$  *opGCaMP6f*, *tdTomato* animals were performed  
824 and analyzed as described in [60] with the following changes.

### 825 826 **Analysis protocol:**

827  
828 *Initial image Processing:* TIFF videos from two-photon microscopy were processed in Fiji to  
829 merge green (opGCaMP6f) and red (tdTomato) channels [106]. No brightness or contrast  
830 adjustments were performed, in order to standardize region-of-interest (ROI) selection.

831  
832 *ROI Selection:* The tdTomato channel was used to select ROIs containing neuronal processes,  
833 using custom Python software relying on OpenCV and Numpy libraries. Images were converted  
834 into 8-bits, color ranges were extended, and contrast was augmented to better detect  
835 ROIs. Baseline signals were subtracted and then brightness was scaled to a maximum value  
836 was 255. A blur filter was applied to the image (blur value =10), and then an Otsu Threshold  
837 was applied to binarize the grayscale image. After the image was thus thresholded, an erosion  
838 function (kernel size 5) was used to avoid the detection of overly large or small ROIs. The  
839 contours of all ROIs were detected on the eroded image and a copy of the contrast-augmented  
840 image was returned with ROI contours drawn super-imposed. A minimum threshold of 150  
841 pixels was set on the ROI size to avoid overly small detections.

842  
843 *Fluorescence extraction:* Mean fluorescence values for the tdTomato, or opGCaMP6f channels  
844 were calculated over all ROIs combined. Baseline signals for dF/F calculations were defined as  
845 mean raw fluorescence binned over 2.5 s.

846  
847 *Synchronization:* Fluorescence measurements, behavior videography, and optic flow of  
848 spherical treadmill rotations were all recorded at different frame rates. Thus, we used  
849 interpolation to upsample fluorescence signals and behavioral videography acquisition rates to  
850 that of optic flow. Optic flow and fluorescence data were then smoothed (window size 200 ms).  
851 Optic flow data was then translated into mm/s in the anterior-posterior and medial-lateral  
852 directions and into degrees/s for yaw.

853

854 *Automatic Walking Classifier:* An automatic walking classifier was used to define walking bouts.  
855 A velocity of 0.31 mm/s was empirically determined as a threshold for distinguishing between  
856 walking and standing. The minimum threshold for bout length was empirically set to 2 s.

857  
858 *Manual behavioral annotation:* Videos showing a side view of the fly on the spherical treadmill  
859 were manually annotated to capture four behaviors: (1) walk, (2) stop, (3) proboscis extension  
860 reflex, and (4) groom. All frames that could not neatly be classified as one of these four  
861 behaviors were defined as (5) other.

## 862 863 **Statistics**

864  
865 *Manually Annotated Behaviors:* For each animal, the average dF/F for frames labeled a  
866 particular behavior classification was calculated. Comparisons between behaviors were made  
867 using Kruskal-Wallis testing with Dunn's correction for multiple comparisons.

868  
869 *Timecourses:* For each behavioral classification, an average time course was determined for  
870 each animal by averaging dF/F for all behavioral bouts, centering them on bout onset. Averages  
871 across all animals were then calculated, and 95% confidence intervals fit by bootstrapping.

872  
873 *Correlation Analysis:* To calculate the correlation between walking velocity and dF/F, we used a  
874 Pearson correlation to calculate R.

## 875 876 **Acknowledgements**

877 We thank Cesar Mendes for helping to optimize the Flywalker system, Imre Bartos for his help  
878 in updating the Flywalker analysis code, Andrew Straw for editing his motmot video collection  
879 software to make it compatible with our system, Meredith Peterson, Floris van Bruegel, Irene  
880 Kim and Michael Dickinson for assistance in building the arena hardware and data analysis  
881 approaches, Randy Bruno for assistance with analysis approaches, Laura Hermans in the  
882 Ramdya lab for her assistance with data analysis. We thank Daniel Wolpert for comments on  
883 the manuscript. This work was supported by NIH grants to R.S.M (1U01NS090514-01 and  
884 1U19NS104655-01) the Columbia MD/PhD Training program (GM007367) and the Columbia  
885 Neuroscience Program (5T32NS064928-07). P.R. acknowledges support from the Swiss  
886 National Science Foundation (31003A\_175667)

## 887 888 **Author contributions**

889 C.H. and R.S.M. conceived of the project and designed the experiments; T.T. and R.H.  
890 designed and built the behavior rigs; C.H. conducted all of the experiments and performed all  
891 data analysis, with the exception of calcium imaging experiments, which were carried out by C.-  
892 L.C. and analyzed by C.H., C.-L.C., and P.R.; C.H. and R.S.M. wrote the paper and P.R. edited  
893 it.

894

## 895 References

- 896 [1] Ritzmann RE, Büschges A. Adaptive motor behavior in insects. *Curr Opin Neurobiol*  
897 2007;17:629–36. doi:10.1016/j.conb.2008.01.001.
- 898 [2] Gibert P, Huey RB, Gilchrist GW. Locomotor performance of *Drosophila*  
899 *melanogaster*: interactions among developmental and adult temperatures, age, and  
900 geography. *Evolution* 2001;55:205–9.
- 901 [3] Blaesing B, Cruse H. Stick insect locomotion in a complex environment: climbing over  
902 large gaps. *J Exp Biol* 2004;207:1273–86.
- 903 [4] Ritzmann RE, Quinn RD, Fischer MS. Convergent evolution and locomotion through  
904 complex terrain by insects, vertebrates and robots. *Arthropod Struct Dev*  
905 2004;33:361–79. doi:10.1016/j.asd.2004.05.001.
- 906 [5] Pick S, Strauss R. Goal-driven behavioral adaptations in gap-climbing *Drosophila*.  
907 *Current Biology* 2005;15:1473–8. doi:10.1016/j.cub.2005.07.022.
- 908 [6] Isakov A, Buchanan SM, Sullivan B, Ramachandran A, Chapman JKS, Lu ES, et al.  
909 Recovery of locomotion after injury in *Drosophila* depends on proprioception. *J Exp*  
910 *Biol* 2016. doi:10.1242/jeb.133652.
- 911 [7] Mendes CS, Rajendren SV, Bartos I, Márka S, Mann RS. Kinematic responses to  
912 changes in walking orientation and gravitational load in *Drosophila melanogaster*.  
913 *PLoS ONE* 2014;9:e109204. doi:10.1371/journal.pone.0109204.
- 914 [8] Wosnitza A, Bockemühl T, Dübbert M, Scholz H, Büschges A. Inter-leg coordination in  
915 the control of walking speed in *Drosophila*. *J Exp Biol* 2013;216:480–91.  
916 doi:10.1242/jeb.078139.
- 917 [9] Triphan T, Nern A, Roberts SF, Korff W, Naiman DQ, Strauss R. A screen for  
918 constituents of motor control and decision making in *Drosophila* reveals visual  
919 distance-estimation neurons. *Sci Rep* 2016;6:27000. doi:10.1038/srep27000.
- 920 [10] Mendes CS, Bartos I, Akay T, Márka S, Mann RS. Quantification of gait parameters in  
921 freely walking wild type and sensory deprived *Drosophila melanogaster*.  
922 *Elifesciencesorg* 2013. doi:10.7554/eLife.00231.
- 923 [11] Getting PA, Dekin MS. Mechanisms of pattern generation underlying swimming in  
924 *Tritonia*. IV. Gating of central pattern generator. *J Neurophysiol* 1985;53:466–80.  
925 doi:10.1152/jn.1985.53.2.466.
- 926 [12] Pearson KG. Common principles of motor control in vertebrates and invertebrates.  
927 *Annu Rev Neurosci* 1993;16:265–97. doi:10.1146/annurev.ne.16.030193.001405.
- 928 [13] Morton DW, Chiel HJ. Neural architectures for adaptive behavior. *Trends Neurosci*  
929 1994;17:413–20.
- 930 [14] Harris-Warrick RM, Marder E. Modulation of neural networks for behavior. *Annu Rev*  
931 *Neurosci* 1991;14:39–57. doi:10.1146/annurev.ne.14.030191.000351.
- 932 [15] Graham D. Pattern and Control of Walking in Insects. In: Berridge MJ, Treherne JE,  
933 Wigglesworth VB, editors. *Advances in Insect Physiology*, vol. 18, Academic Press;  
934 1985, pp. 31–140.
- 935 [16] Hughes GM. The Co-Ordination of Insect Movements. *J Exp Biol* 1952;29:267–85.
- 936 [17] Strauss R, Heisenberg M. Coordination of legs during straight walking and turning in  
937 *Drosophila melanogaster*. *J Comp Physiol A* 1990;167:403–12.
- 938 [18] Court RC, Armstrong JD, Borner J, Card G, Costa M, Dickinson M, et al. A Systematic  
939 Nomenclature for the *Drosophila* Ventral Nervous System. *bioRxiv* 2017.  
940 doi:10.1101/122952.
- 941 [19] Venkatasubramanian L, Mann RS. The development and assembly of the *Drosophila*  
942 adult ventral nerve cord. *Curr Opin Neurobiol* 2019;56:135–43.

- 943 doi:10.1016/j.conb.2019.01.013.
- 944 [20] Bässler U, Buschges A. Pattern generation for stick insect walking movements--  
945 multisensory control of a locomotor program. *Brain Res Brain Res Rev* 1998;27:65–  
946 88.
- 947 [21] Baek M, Mann RS. Lineage and birth date specify motor neuron targeting and  
948 dendritic architecture in adult *Drosophila*. *J Neurosci* 2009;29:6904–16.  
949 doi:10.1523/JNEUROSCI.1585-09.2009.
- 950 [22] Brierley DJ, Blanc E, Reddy OV, VijayRaghavan K, Williams DW. Dendritic targeting  
951 in the leg neuropil of *Drosophila*: the role of midline signalling molecules in generating  
952 a myotopic map. *PLoS Biol* 2009;7:e1000199. doi:10.1371/journal.pbio.1000199.
- 953 [23] Tuthill JC, Wilson RI. Mechanosensation and Adaptive Motor Control in Insects.  
954 *Current Biology* 2016;26:R1022–38. doi:10.1016/j.cub.2016.06.070.
- 955 [24] Murphey RK, Possidente DR, Vandervorst P, Ghysen A. Compartments and the  
956 topography of leg afferent projections in *Drosophila*. *J Neurosci* 1989;9:3209–17.
- 957 [25] Yellman C, Tao H, He B, Hirsh J. Conserved and sexually dimorphic behavioral  
958 responses to biogenic amines in decapitated *Drosophila*. *Proc Natl Acad Sci USA*  
959 1997;94:4131–6.
- 960 [26] Graham D. Simulation of a Model for the Coordination of Leg Movement in Free  
961 Walking Insects 1977:1–12.
- 962 [27] Büschges A. Sensory control and organization of neural networks mediating  
963 coordination of multisegmental organs for locomotion. *J Neurophysiol* 2005;93:1127–  
964 35. doi:10.1152/jn.00615.2004.
- 965 [28] Pearson KG. Proprioceptive regulation of locomotion. *Curr Opin Neurobiol*  
966 1995;5:786–91.
- 967 [29] Stein W, Büschges A, Bässler U. Intersegmental transfer of sensory signals in the  
968 stick insect leg muscle control system. *J Neurobiol* 2006;66:1253–69.  
969 doi:10.1002/neu.20285.
- 970 [30] Bekoff A, Nusbaum MP, Sabichi AL, Clifford M. Neural control of limb coordination. I.  
971 Comparison of hatching and walking motor output patterns in normal and deafferented  
972 chicks. *J Neurosci* 1987;7:2320–30.
- 973 [31] Grillner S, Zangger P. On the central generation of locomotion in the low spinal cat.  
974 *Exp Brain Res* 1979;34:241–61.
- 975 [32] Marder E, Bucher D. Central pattern generators and the control of rhythmic  
976 movements. *Current Biology* 2001;11:R986–96.
- 977 [33] Rossignol S, Dubuc R, Gossard J-P. Dynamic sensorimotor interactions in  
978 locomotion. *Physiol Rev* 2006;86:89–154. doi:10.1152/physrev.00028.2005.
- 979 [34] Weimann JM, Meyrand P, Marder E. Neurons that form multiple pattern generators:  
980 identification and multiple activity patterns of gastric/pyloric neurons in the crab  
981 stomatogastric system. *J Neurophysiol* 1991;65:111–22.
- 982 [35] Hooper SL, Marder E. Modulation of a central pattern generator by two neuropeptides,  
983 proctolin and FMRFamide. *Brain Res* 1984;305:186–91.
- 984 [36] Flamm RE, Harris-Warrick RM. Aminergic modulation in lobster stomatogastric  
985 ganglion. I. Effects on motor pattern and activity of neurons within the pyloric circuit. *J*  
986 *Neurophysiol* 1986;55:847–65. doi:10.1152/jn.1986.55.5.847.
- 987 [37] Flamm RE, Harris-Warrick RM. Aminergic modulation in lobster stomatogastric  
988 ganglion. II. Target neurons of dopamine, octopamine, and serotonin within the pyloric  
989 circuit. *J Neurophysiol* 1986;55:866–81. doi:10.1152/jn.1986.55.5.866.
- 990 [38] Hooper SL, Marder E. Modulation of the lobster pyloric rhythm by the peptide  
991 proctolin. *J Neurosci* 1987;7:2097–112.
- 992 [39] Nusbaum MP, Marder E. A neuronal role for a crustacean red pigment concentrating  
993 hormone-like peptide: neuroodulation of the pyloric rhythm in the crab, cancer

- 994 borealis. *J Exp Biol* 1988;165–81.
- 995 [40] Marder E. Neuromodulation of neuronal circuits: back to the future. *Neuron*  
996 2012;76:1–11. doi:10.1016/j.neuron.2012.09.010.
- 997 [41] Barbeau H, Rossignol S. Initiation and modulation of the locomotor pattern in the adult  
998 chronic spinal cat by noradrenergic, serotonergic and dopaminergic drugs. *Brain Res*  
999 1991;546:250–60.
- 1000 [42] Harris-Warrick RM, Cohen AH. Serotonin modulates the central pattern generator for  
1001 locomotion in the isolated lamprey spinal cord. *J Exp Biol* 1985;116:27–46.
- 1002 [43] Parker D. Serotonergic modulation of locust motor neurons. *J Neurophysiol*  
1003 1995;73:923–32.
- 1004 [44] Albin SD, Kaun KR, Knapp J-M, Chung P, Heberlein U, Simpson JH. A Subset of  
1005 Serotonergic Neurons Evokes Hunger in Adult *Drosophila*. *Curr Biol* 2015;25:2435–  
1006 40. doi:10.1016/j.cub.2015.08.005.
- 1007 [45] Majeed ZR, Abdeljaber E, Soveland R, Cornwell K, Bankemper A, Koch F, et al.  
1008 Modulatory Action by the Serotonergic System: Behavior and Neurophysiology in  
1009 *Drosophila melanogaster*. *Neural Plast* 2016;2016:7291438.  
1010 doi:10.1155/2016/7291438.
- 1011 [46] Mohammad F, Aryal S, Ho J, Stewart JC, Norman NA, Tan TL, et al. Ancient Anxiety  
1012 Pathways Influence *Drosophila* Defense Behaviors. *Curr Biol* 2016;26:981–6.  
1013 doi:10.1016/j.cub.2016.02.031.
- 1014 [47] Pooryasin A, Fiala A. Identified Serotonin-Releasing Neurons Induce Behavioral  
1015 Quiescence and Suppress Mating in *Drosophila*. *J Neurosci* 2015;35:12792–812.  
1016 doi:10.1523/JNEUROSCI.1638-15.2015.
- 1017 [48] Qian Y, Cao Y, Deng B, Yang G, Li J, Xu R, et al. Sleep homeostasis regulated by  
1018 5HT2b receptor in a small subset of neurons in the dorsal fan-shaped body of  
1019 *drosophila*. *Elife* 2017;6. doi:10.7554/eLife.26519.
- 1020 [49] Pendleton RG, Rasheed A, Sardina T, Tully T, Hillman R. Effects of tyrosine  
1021 hydroxylase mutants on locomotor activity in *Drosophila*: a study in functional  
1022 genomics. *Behav Genet* 2002;32:89–94.
- 1023 [50] Riemensperger T, Isabel G, Coulom H, Neuser K, Seugnet L, Kume K, et al.  
1024 Behavioral consequences of dopamine deficiency in the *Drosophila* central nervous  
1025 system. *Proc Natl Acad Sci USA* 2011;108:834–9. doi:10.1073/pnas.1010930108.
- 1026 [51] Zhang W, Ge W, Wang Z. A toolbox for light control of *Drosophila* behaviors through  
1027 Channelrhodopsin 2-mediated photoactivation of targeted neurons. *Eur J Neurosci*  
1028 2007;26:2405–16. doi:10.1111/j.1460-9568.2007.05862.x.
- 1029 [52] Ueno T, Masuda N, Kume S, Kume K. Dopamine modulates the rest period length  
1030 without perturbation of its power law distribution in *Drosophila melanogaster*. *PLoS*  
1031 *ONE* 2012;7:e32007. doi:10.1371/journal.pone.0032007.
- 1032 [53] Yang Z, Yu Y, Zhang V, Tian Y, Qi W, Wang L. Octopamine mediates starvation-  
1033 induced hyperactivity in adult *Drosophila*. *Proc Natl Acad Sci USA* 2015;112:5219–24.  
1034 doi:10.1073/pnas.1417838112.
- 1035 [54] Brembs B, Christiansen F, Pflüger HJ, Duch C. Flight initiation and maintenance  
1036 deficits in flies with genetically altered biogenic amine levels. *J Neurosci*  
1037 2007;27:11122–31. doi:10.1523/JNEUROSCI.2704-07.2007.
- 1038 [55] Alekseyenko OV, Lee C, Kravitz EA. Targeted manipulation of serotonergic  
1039 neurotransmission affects the escalation of aggression in adult male *Drosophila*  
1040 *melanogaster*. *PLoS ONE* 2010;5:e10806. doi:10.1371/journal.pone.0010806.
- 1041 [56] Friggi-Grelin F, Coulom H, Meller M, Gomez D, Hirsh J, Birman S. Targeted gene  
1042 expression in *Drosophila* dopaminergic cells using regulatory sequences from tyrosine  
1043 hydroxylase. *J Neurobiol* 2003;54:618–27. doi:10.1002/neu.10185.
- 1044 [57] Cole SH, Carney GE, McClung CA, Willard SS, Taylor BJ, Hirsh J. Two functional but

- 1045 noncomplementing *Drosophila* tyrosine decarboxylase genes: distinct roles for neural  
1046 tyramine and octopamine in female fertility. *J Biol Chem* 2005;280:14948–55.  
1047 doi:10.1074/jbc.M414197200.
- 1048 [58] Riemensperger T, Issa A-R, Pech U, Coulom H, Nguyễn M-V, Cassar M, et al. A  
1049 single dopamine pathway underlies progressive locomotor deficits in a *Drosophila*  
1050 model of Parkinson disease. *Cell Rep* 2013;5:952–60.  
1051 doi:10.1016/j.celrep.2013.10.032.
- 1052 [59] Baines RA, Uhler JP, Thompson A, Sweeney ST, Bate M. Altered electrical properties  
1053 in *Drosophila* neurons developing without synaptic transmission. *J Neurosci*  
1054 2001;21:1523–31.
- 1055 [60] Chen C-L, Hermans L, Viswanathan MC, Fortun D, Aymanns F, Unser M, et al.  
1056 Imaging neural activity in the ventral nerve cord of behaving adult *Drosophila*. *Nature*  
1057 *Communications* 2018;9:459. doi:10.1126/science.1093173.
- 1058 [61] Lee G, Park JH. Hemolymph sugar homeostasis and starvation-induced hyperactivity  
1059 affected by genetic manipulations of the adipokinetic hormone-encoding gene in  
1060 *Drosophila melanogaster*. *Genetics* 2004;167:311–23.
- 1061 [62] Cho W, Heberlein U, Wolf FW. Habituation of an odorant-induced startle response in  
1062 *Drosophila*. *Genes Brain Behav* 2004;3:127–37. doi:10.1111/j.1601-  
1063 183x.2004.00061.x.
- 1064 [63] Yeomans JS, Li L, Scott BW, Frankland PW. Tactile, acoustic and vestibular systems  
1065 sum to elicit the startle reflex. *Neurosci Biobehav Rev* 2002;26:1–11.
- 1066 [64] Yeomans JS, Frankland PW. The acoustic startle reflex: neurons and connections.  
1067 *Brain Res Brain Res Rev* 1995;21:301–14.
- 1068 [65] Bullock TH. Comparative Neuroethology of Startle, Rapid Escape, and Giant Fiber-  
1069 Mediated Responses. In: Eaton RC, editor. *Neural Mechanisms of Startle Behavior*,  
1070 Boston, MA: Springer US; 1984, pp. 1–13.
- 1071 [66] Card GM. Escape behaviors in insects. *Curr Opin Neurobiol* 2012;22:180–6.  
1072 doi:10.1016/j.conb.2011.12.009.
- 1073 [67] Zacarias R, Namiki S, Card GM, Vasconcelos ML, Moita MA. Speed dependent  
1074 descending control of freezing behavior in *Drosophila melanogaster*. *Nature*  
1075 *Communications* 2018;9:3697. doi:10.1038/s41467-018-05875-1.
- 1076 [68] Davis M. The Mammalian Startle Response. In: Eaton RC, editor. *Neural Mechanisms*  
1077 *of Startle Behavior*, Boston, MA: Springer US; 1984, pp. 287–351. doi:10.1007/978-1-  
1078 4899-2286-1\_10.
- 1079 [69] Saudou F, Hen R. 5-Hydroxytryptamine receptor subtypes in vertebrates and  
1080 invertebrates. *Neurochem Int* 1994;25:503–32.
- 1081 [70] Saudou F, Boschert U, Amlaiky N, Plassat JL, Hen R. A family of *Drosophila* serotonin  
1082 receptors with distinct intracellular signalling properties and expression patterns.  
1083 *Embo J* 1992;11:7–17.
- 1084 [71] Hen R. Structural and functional conservation of serotonin receptors throughout  
1085 evolution. *Exs* 1993;63:266–78.
- 1086 [72] Tierney AJ. Invertebrate serotonin receptors: a molecular perspective on classification  
1087 and pharmacology. *J Exp Biol* 2018;221:jeb184838. doi:10.1038/nature04216.
- 1088 [73] Witz P, Amlaiky N, Plassat JL, Maroteaux L, Borrelli E, Hen R. Cloning and  
1089 characterization of a *Drosophila* serotonin receptor that activates adenylate cyclase.  
1090 *Proc Natl Acad Sci USA* 1990;87:8940–4.
- 1091 [74] Blenau W, Daniel S, Balfanz S, Thamm M, Baumann A. Dm5-HT2B: Pharmacological  
1092 Characterization of the Fifth Serotonin Receptor Subtype of *Drosophila melanogaster*.  
1093 *Front Syst Neurosci* 2017;11:28. doi:10.3389/fnsys.2017.00028.
- 1094 [75] Colas JF, Launay JM, Kellermann O, Rosay P, Maroteaux L. *Drosophila* 5-HT2  
1095 serotonin receptor: coexpression with fushi-tarazu during segmentation. *Proc Natl*

- 1096 Acad Sci USA 1995;92:5441–5.
- 1097 [76] Gnerer JP, Venken KJT, Dierick HA. Gene-specific cell labeling using MiMIC  
1098 transposons. *Nucleic Acids Res* 2015;43:e56. doi:10.1093/nar/gkv113.
- 1099 [77] Veasey SC, Fornal CA, Metzler CW, Jacobs BL. Response of serotonergic caudal  
1100 raphe neurons in relation to specific motor activities in freely moving cats. *J Neurosci*  
1101 1995;15:5346–59.
- 1102 [78] Veasey SC, Fornal CA, Metzler CW, Jacobs BL. Single-unit responses of serotonergic  
1103 dorsal raphe neurons to specific motor challenges in freely moving cats. *Neuroscience*  
1104 1997;79:161–9.
- 1105 [79] Correia PA, Lottem E, Banerjee D, Machado AS, Carey MR, Mainen ZF. Transient  
1106 inhibition and long-term facilitation of locomotion by phasic optogenetic activation of  
1107 serotonin neurons. *Elife* 2017;6. doi:10.7554/eLife.20975.
- 1108 [80] Yilmaz M, Meister M. Rapid innate defensive responses of mice to looming visual  
1109 stimuli. *Curr Biol* 2013;23:2011–5. doi:10.1016/j.cub.2013.08.015.
- 1110 [81] Gibson WT, Gonzalez CR, Fernandez C, Ramasamy L, Tabachnik T, Du RR, et al.  
1111 Behavioral responses to a repetitive visual threat stimulus express a persistent state  
1112 of defensive arousal in *Drosophila*. *Curr Biol* 2015;25:1401–15.  
1113 doi:10.1016/j.cub.2015.03.058.
- 1114 [82] Card G, Dickinson MH. Visually mediated motor planning in the escape response of  
1115 *Drosophila*. *Current Biology* 2008;18:1300–7. doi:10.1016/j.cub.2008.07.094.
- 1116 [83] Davis M, Sheard MH. Habituation and sensitization of the rat startle response: effects  
1117 of raphe lesions. *Physiol Behav* 1974;12:425–31. doi:10.1016/0031-9384(74)90120-6.
- 1118 [84] Carlton PL, Advokat C. Attenuated habituation due to parachlorophenylalanine.  
1119 *Pharmacol Biochem Behav* 1973;1:657–63. doi:10.1016/0091-3057(73)90029-4.
- 1120 [85] Davis M, Strachan DI, Kass E. Excitatory and inhibitory effects of serotonin on  
1121 sensorimotor reactivity measured with acoustic startle. *Science* 1980;209:521–3.  
1122 doi:10.1126/science.7394520.
- 1123 [86] Astrachan DI, Davis M. Spinal modulation of the acoustic startle response: the role of  
1124 norepinephrine, serotonin and dopamine. *Brain Res* 1981;206:223–8.  
1125 doi:10.1016/0006-8993(81)90121-9.
- 1126 [87] Commissaris RL, Davis M. Opposite effects of N,N-dimethyltryptamine (DMT) and 5-  
1127 methoxy-n,n-dimethyltryptamine (5-MeODMT) on acoustic startle: spinal vs brain sites  
1128 of action. *Neurosci Biobehav Rev* 1982;6:515–20.
- 1129 [88] Davis M, Astrachan DI, Gendelman PM, Gendelman DS. 5-Methoxy-N,N-  
1130 dimethyltryptamine: spinal cord and brainstem mediation of excitatory effects on  
1131 acoustic startle. *Psychopharmacology (Berl)* 1980;70:123–30.  
1132 doi:10.1007/bf00435302.
- 1133 [89] Tierney AJ. Structure and function of invertebrate 5-HT receptors: a review. *Comp*  
1134 *Biochem Physiol, Part a Mol Integr Physiol* 2001;128:791–804.
- 1135 [90] Perrier J-F, Cotel F. Serotonergic modulation of spinal motor control. *Curr Opin*  
1136 *Neurobiol* 2014;33C:1–7. doi:10.1016/j.conb.2014.12.008.
- 1137 [91] Perrier J-F, Rasmussen HB, Christensen RK, Petersen AV. Modulation of the intrinsic  
1138 properties of motoneurons by serotonin. *Curr Pharm Des* 2013;19:4371–84.
- 1139 [92] Johnson MD, Heckman CJ. Gain control mechanisms in spinal motoneurons. *Front*  
1140 *Neural Circuits* 2014;8:81. doi:10.3389/fncir.2014.00081.
- 1141 [93] Trinler U, Leboeuf F, Hollands K, Jones R, Baker R. Estimation of muscle activation  
1142 during different walking speeds with two mathematical approaches compared to  
1143 surface EMG. *Gait & Posture* 2018;64:266–73. doi:10.1016/j.gaitpost.2018.06.115.
- 1144 [94] Voloshina AS, Kuo AD, Daley MA, Ferris DP. Biomechanics and energetics of walking  
1145 on uneven terrain. *J Exp Biol* 2013;216:3963–70. doi:10.1242/jeb.081711.
- 1146 [95] Cappellini G, Ivanenko YP, Dominici N, Poppele RE, Lacquaniti F. Motor patterns



- 1147 during walking on a slippery walkway. *J Neurophysiol* 2010;103:746–60.  
1148 doi:10.1152/jn.00499.2009.
- 1149 [96] Wade C, Redfern MS, Andres RO, Breloff SP. Joint kinetics and muscle activity while  
1150 walking on ballast. *Hum Factors* 2010;52:560–73. doi:10.1177/0018720810381996.
- 1151 [97] Nakazawa K, Kawashima N, Akai M, Yano H. On the reflex coactivation of ankle  
1152 flexor and extensor muscles induced by a sudden drop of support surface during  
1153 walking in humans. *J Appl Physiol* 2004;96:604–11.  
1154 doi:10.1152/jappphysiol.00670.2003.
- 1155 [98] Heitler WJ, Burrows M. The locust jump. I. The motor programme. *J Exp Biol*  
1156 1977;66:203–19.
- 1157 [99] Pearson KG, O’Shea M. Escape Behavior of the Locust. In: Eaton RC, editor. *Neural*  
1158 *Mechanisms of Startle Behavior*, Boston, MA: Springer US; 1984, pp. 163–78.
- 1159 [100] Field L, Matheson T. Chordotonal Organs of Insects. *Advances in Insect Physiology*  
1160 1998;27.
- 1161 [101] Kavlie RG, Albert JT. Chordotonal organs. *Curr Biol* 2013;23:R334–5.  
1162 doi:10.1016/j.cub.2013.03.048.
- 1163 [102] Mamiya A, Gurung P, Tuthill JC. Neural Coding of Leg Proprioception in *Drosophila*.  
1164 *Neuron* 2018;100:636–6. doi:10.1016/j.neuron.2018.09.009.
- 1165 [103] Ryder E, Blows F, Ashburner M, Bautista-Llacer R, Coulson D, Drummond J, et al.  
1166 The DrosDel collection: a set of P-element insertions for generating custom  
1167 chromosomal aberrations in *Drosophila melanogaster*. *Genetics* 2004;167:797–813.  
1168 doi:10.1534/genetics.104.026658.
- 1169 [104] Klapoetke NC, Murata Y, Kim SS, Pulver SR, Birdsey-Benson A, Cho YK, et al.  
1170 Independent optical excitation of distinct neural populations. *Nat Methods*  
1171 2014;11:338–46. doi:10.1038/nmeth.2836.
- 1172 [105] Shearin HK, Dvarishkis AR, Kozeluh CD, Stowers RS. Expansion of the gateway  
1173 multisite recombination cloning toolkit. *PLoS ONE* 2013;8:e77724.  
1174 doi:10.1371/journal.pone.0077724.
- 1175 [106] Schindelin J, Arganda-Carreras I, Frise E, Kaynig V, Longair M, Pietzsch T, et al. Fiji:  
1176 an open-source platform for biological-image analysis. *Nat Methods* 2012;9:676–82.  
1177 doi:10.1002/0471142727.mb1420s92.
- 1178 [107] Simon JC, Dickinson MH. A new chamber for studying the behavior of *Drosophila*.  
1179 *PLoS ONE* 2010;5:e8793. doi:10.1371/journal.pone.0008793.
- 1180 [108] Straw AD, Dickinson MH. Motmot, an open-source toolkit for realtime video  
1181 acquisition and analysis. *Source Code Biol Med* 2009;4:5. doi:10.1186/1751-0473-4-  
1182 5.
- 1183 [109] Eyjolfsdottir E, Branson S, Burgos-Artizzu XP, Hoopfer ED, Schor J, Anderson DJ, et  
1184 al. Detecting Social Actions of Fruit Flies. In: Fleet D, Pajdla T, Schiele B, Tuytelaars  
1185 T, editors. *Cham: Springer International Publishing*; 2014, pp. 772–87.  
1186  
1187
